# Supplementary material for: Dietary Carbohydrate as Glycemic Load, Not Fat, Coupled with Genetic Permissiveness Favoring Rapid Growth and Extra Calories, Dictate Metabolic Syndrome and Diabetes Induction in Nile Rats (Arvicanthis niloticus)
Source: MDPI journal article supplement (doi:10.3390/nu14153064), 2022-07-26
Supplement: s1 [file s1]

## Supplementary Materials

**Table S1.** Diet Compositions.

|                                           |                | <b>Diet</b>    |                |                |               |
|-------------------------------------------|----------------|----------------|----------------|----------------|---------------|
| <b>Experiment 1 (PKOB) Diet#</b>          | <b>195</b>     | <b>196</b>     | <b>197</b>     | 198            | 199           |
| <b>Experiment 2 (AFB) Diet#</b>           | 200            | 201            | 202            | 203            | 204           |
| CHO:fat:protein %energy                   | 70:10:20       | 60:20:20       | 50:30:20       | 40:40:20       | 20:60:20      |
| CHO/Fat %energy ratio                     | 7.0            | 3.0            | 1.7            | 1.0            | 0.3           |
| kcal/g as dry weight                      | 4.0            | 4.2            | 4.5            | 4.8            | 5.5           |
| Gload (units/2000 kcal)                   | 293            | 252            | 210            | 167            | 84            |
| <b>Ingredient</b>                         | <b>g/kg</b>    |                |                |                |               |
| <b>Protein</b>                            |                |                |                |                |               |
| Casein                                    | 100            | 106            | 112            | 120            | 138           |
| Lactalbumin                               | 100            | 106            | 112            | 120            | 138           |
| <b>CHO</b>                                |                |                |                |                |               |
| Dextrose                                  | 349            | 315            | 281            | 238            | 138           |
| Cornstarch                                | 288 (+60 gel)* | 256 (+60 gel)* | 222 (+60 gel)* | 178 (+60 gel)* | 78 (+60 gel)* |
| <b>Fat</b>                                |                |                |                |                |               |
| Experiment 1 – PKOB** <sup>a</sup>        | 44             | 95             | 148            | 214            | 369           |
| Experiment 2 – AFB (%fat)** <sup>b</sup>  | 46 (44)        | 100 (95)       | 156 (148)      | 225 (214)      | 388 (369)     |
| Mineral mix (Ausman-Hayes) <sup>c</sup>   | 44             | 47             | 49             | 53             | 61            |
| Vitamin mix (Hayes-Cathcart) <sup>c</sup> | 11             | 12             | 12             | 13             | 15            |
| <b>Choline Chloride</b>                   | 3              | 3              | 3              | 3              | 3             |
| <b>Cholesterol</b> – Experiment 1         | 0.6            | 0.6            | 0.6            | 0.6            | 0.6           |
| <b>Cholesterol</b> – Experiment 2         | 0.6 (+0.05)**  | 0.6 (+0.10)**  | 0.6 (+0.16)**  | 0.6 (+0.23)**  | 0.6 (+0.41)** |

<sup>a</sup>PKOB composition: 31% Palm Kernel Oil, 33% Soybean Oil, 36% Canola oil; <sup>b</sup>AFB composition: 21% Butter, 46% beef tallow, 15% lard, 18% Soybean oil; <sup>c</sup>Leow et al. (2016) [40]; \*60g cornstarch added to 800mL water to form gel; \*\*Pre-made PKOB had 20% water content while PKOB formulated in the lab is 100% fat; \*\*\*AFB is adjusted to butter having 20% water with cholesterol contributed by animal fats.

Table S2. Fatty Acid Profile of the Fat in each Diet.

|                                           |                | Diet                      |                                            |
|-------------------------------------------|----------------|---------------------------|--------------------------------------------|
| Experiment                                |                | Experiment 1              | Experiment 2                               |
| Fat Composition                           |                | PKOB <sup>1</sup>         | AFB <sup>2</sup>                           |
| Saturated fatty acid profile <sup>^</sup> |                | Fatty acid Percentage (%) |                                            |
| Acetic Acid + Propionic Acid              | 2:0+3:0        | n/a                       | n/a                                        |
| Butyric Acid + Caproic Acid               | 4:0+6:0        | 0.1                       | 1.2                                        |
| Caprylic Acid                             | 8:0            | 3.3                       | 0.3                                        |
| Capric Acid                               | 10:0           | 1.1                       | 0.5                                        |
| Lauric Acid                               | 12:0           | 14.9                      | 0.7                                        |
| Myristic Acid                             | 14:0           | 5.1                       | 4                                          |
| Palmitic Acid                             | 16:0           | 7.5                       | 22.6                                       |
| Stearic Acid                              | 18:0           | 2.8                       | 13.8                                       |
| Unsaturated fatty acid profile            |                |                           |                                            |
| Oleic acid                                | n9** 18:1(n-9) | 34.0                      | 36.3                                       |
| Palmitoleic acid                          | n7** 16:1(n-7) | 2.5                       | 2.6                                        |
| Linoleic acid                             | n6** 18:2(n-6) | 26.7                      | 13.0                                       |
| α-Linoleic acid                           | n3** 18:3(n-3) | 5.7                       | 1.8                                        |
| Total saturated fatty acids               |                | 32.5                      | 44.7                                       |
| Total monounsaturated fatty acids         |                | 34.1                      | 40.2                                       |
| Total polyunsaturated fatty acids         |                | 33.5                      | 14.8                                       |
| P/S* ratio                                |                | 1.00                      | 0.35                                       |
| S:M:P in diet                             |                | 33:34:33                  | 9:8:3                                      |
| CHO:fat:protein %energy ratio             |                | 18:2(n-6)**               | (total polyunsaturated fatty acid) %energy |
| 70:10:20                                  |                | 2.7 (3.4)                 | 1.3 (1.5)                                  |
| 60:20:20                                  |                | 5.3 (6.7)                 | 2.6 (3.0)                                  |
| 50:30:20                                  |                | 8.0 (10.1)                | 3.9 (4.4)                                  |
| 40:40:20                                  |                | 10.7 (13.4)               | 5.2 (5.9)                                  |
| 20:60:20                                  |                | 16.0 (20.1)               | 7.8 (8.9)                                  |

<sup>1</sup>PKOB = 31% Palm Kernel Oil, 33% Soybean Oil, 36% Canola Oil. S:M:P ratio is balanced to 1:1:1 with an ideal P/S ratio of 1.0; <sup>2</sup>AFB = 21% Butter, 46% Tallow, 15% Lard, 18% Soybean oil. S:M:P ratio is 9:8:3. with P/S ratio of 0.35 typical of saturated fat in the American diet; \*18:2+18:3 /8:0-18:0; \*\* n3, n6, n7 and n9 refer to omega 3, 6, 7 and 9, respectively. <sup>^</sup>Diet fatty acids were calculated from published data on fatty acid compositions of fats and oils. [see USDA Handbook 8. Food compositions] and diet compositions in Table S1.

**Table S3.** Diabetic assessment of 3week old male Nile rats fed PKOB diets with different CHO:fat ratios and GLoads for 10 weeks (Experiment 1) – Unsplit by T2DM.

| Diet#                                          | Diet                     |                         |                         |                          |                          |
|------------------------------------------------|--------------------------|-------------------------|-------------------------|--------------------------|--------------------------|
|                                                | 195                      | 196                     | 197                     | 198                      | 199                      |
| n=                                             | 14                       | 14                      | 13                      | 14                       | 14                       |
| <b>CHO:fat:protein %energy</b>                 | <b>70:10:20</b>          | <b>60:20:20</b>         | <b>50:30:20</b>         | <b>40:40:20</b>          | <b>20:60:20</b>          |
| <b>P/S ratio</b>                               | 1.00                     | 1.00                    | 1.00                    | 1.00                     | 1.00                     |
| <b>Resistant/susceptible (% susceptible)</b>   |                          |                         |                         |                          |                          |
| 10 week RBG <75mg/dl>                          | 8/6 (43%)                | 5/9 (64%)               | 7/6 (46%)               | 9/5 (36%)                | 11/3 (21%)               |
| 10 week 30' OGTT <175mg/dl>                    | 6/8 (57%)                | 2/12 (86%)              | 6/7 (54%)               | 6/8 (57%)                | 11/3 (21%)               |
| 10 week FBG <60mg/dl>                          | 12/2 (14%)               | 10/4 (29%)              | 9/4 (31%)               | 7/7 (50%)                | 8/6 (43%)                |
| <b>kcal/g</b>                                  | 4.0                      | 4.2                     | 4.5                     | 4.8                      | 5.5                      |
| <b>CHO:fat %energy ratio</b>                   | 7                        | 3                       | 1.7                     | 1                        | 0.3                      |
| <b>Fat:protein %energy ratio</b>               | 0.5                      | 1.0                     | 1.5                     | 2.0                      | 3.0                      |
| <b>GLoad (g/2000 kcal)</b>                     | 280                      | 245                     | 204                     | 162                      | 82                       |
| <b>RBW (g)</b>                                 |                          |                         |                         |                          |                          |
| Initial (3 weeks of age)                       | 31±6                     | 31±3                    | 32±6                    | 31±3                     | 32±4                     |
| After 3 weeks                                  | 70±8                     | 72±6                    | 74±8                    | 71±5                     | 69±8                     |
| After 6 weeks                                  | 85±8                     | 91±8                    | 90±11                   | 88±8                     | 88±10                    |
| After 10 weeks                                 | 97±8 <sup>a</sup>        | 106±9 <sup>a</sup>      | 104±12                  | 104±9                    | 103±11                   |
| <b>BW gain/day (g/day)</b>                     | 0.88±0.12 <sup>a</sup>   | 1.00±0.12 <sup>a</sup>  | 0.95±0.15               | 0.97±0.12                | 0.97±0.19                |
| <b>Energy intake</b>                           |                          |                         |                         |                          |                          |
| g/day                                          | 16.0±3.0 <sup>abcd</sup> | 14.5±0.7 <sup>aef</sup> | 13.9±1.6 <sup>bgh</sup> | 12.1±0.7 <sup>cegi</sup> | 10.5±0.7 <sup>dghi</sup> |
| <b>kcal/day</b>                                |                          |                         |                         |                          |                          |
| week 2                                         | 25±4                     | 26±2                    | 27±2                    | 24±2                     | 26±2                     |
| week 8                                         | 28±8                     | 27±3                    | 28±4                    | 24±1                     | 26±2                     |
| 10 week average                                | 26±5                     | 26±1                    | 27±3                    | 24±1                     | 26±2                     |
| <b>kcal/kg BW /10 week</b>                     | 265±44                   | 247±20                  | 259±26                  | 227±12                   | 250±20                   |
| <b>18:2(n-6) %energy</b>                       | 2.7                      | 5.3                     | 8.0                     | 10.7                     | 16.0                     |
| <b>GLoad</b>                                   |                          |                         |                         |                          |                          |
| /rat/day                                       | 3.6±0.7 <sup>abcd</sup>  | 3.2±0.2 <sup>aefg</sup> | 2.7±0.3 <sup>behi</sup> | 1.9±0.1 <sup>cfhj</sup>  | 1.1±0.1 <sup>dgiij</sup> |
| /kg BW at 10 weeks                             | 37±6 <sup>abcd</sup>     | 30±2 <sup>aefg</sup>    | 26±3 <sup>behi</sup>    | 18±1 <sup>cfhj</sup>     | 10±1 <sup>dgiij</sup>    |
| Cumulative, 10 weeks                           | 253±48 <sup>abcd</sup>   | 223±11 <sup>aefg</sup>  | 191±22 <sup>behi</sup>  | 134±7 <sup>cfhj</sup>    | 74±5 <sup>dgiij</sup>    |
| cumGLoad/rat/kcal                              | 0.14 <sup>abcd</sup>     | 0.12 <sup>aefg</sup>    | 0.10 <sup>behi</sup>    | 0.08 <sup>cfhj</sup>     | 0.04 <sup>dgiij</sup>    |
| <b>10<sup>th</sup> Week Water Intake (ml)</b>  | 81±158                   | 57±56                   | 78±80                   | 36±15                    | 40±10                    |
| <b>Food efficiency (g BW gained/1000 kcal)</b> |                          |                         |                         |                          |                          |
| 1-6 weeks                                      | 46±8                     | 50±6                    | 46±5                    | 50±8                     | 46±6                     |
| 1-10 weeks                                     | 35±6                     | 38±4                    | 36±4                    | 41±5                     | 37±6                     |
| <b>RBG (mg/dl)</b>                             |                          |                         |                         |                          |                          |
| After 6 weeks                                  | 190±174 <sup>abc</sup>   | 101±68 <sup>a</sup>     | 129±124                 | 71±19 <sup>b</sup>       | 66±12 <sup>c</sup>       |
| After 10 weeks                                 | 144±167                  | 159±126 <sup>a</sup>    | 168±165 <sup>b</sup>    | 110±80                   | 64±10 <sup>ab</sup>      |
| Severity (> 75mg/dl)                           | +69                      | +89                     | +93                     | +35                      | -11                      |
| <b>OGTT (BG mg/dl)</b>                         |                          |                         |                         |                          |                          |

|                               |                         |                       |                      |                      |                      |
|-------------------------------|-------------------------|-----------------------|----------------------|----------------------|----------------------|
| <b>After 6 weeks</b>          |                         |                       |                      |                      |                      |
| FBG, 0 min                    | 57±18                   | 60±24                 | 52±15                | 53±12                | 53±9                 |
| 30 min                        | 268±129                 | 292±95 <sup>a</sup>   | 250±137              | 227±62               | 201±60 <sup>a</sup>  |
| <b>After 10 weeks</b>         |                         |                       |                      |                      |                      |
| FBG, 0 min                    | 48±9 <sup>a</sup>       | 55±9                  | 54±19                | 60±18                | 62±21 <sup>a</sup>   |
| 30 min                        | 213±101                 | 279±152 <sup>a</sup>  | 245±150              | 209±85               | 172±51 <sup>a</sup>  |
| 60 min                        | 147±109                 | 183±114               | 202±153              | 190±92               | 151±58               |
| <b>Organ weight (%BW)</b>     |                         |                       |                      |                      |                      |
| Liver                         | 3.7±0.7                 | 3.6±0.5               | 3.8±0.7              | 3.4±0.4              | 3.6±0.4              |
| Kidney                        | 0.8±0.2 <sup>abc</sup>  | 0.7±0.1 <sup>a</sup>  | 0.7±0.1              | 0.7±0.1 <sup>b</sup> | 0.7±0.1 <sup>c</sup> |
| Cecum                         | 1.3±0.5 <sup>abcd</sup> | 1.0±0.2 <sup>a</sup>  | 1.1±0.3 <sup>b</sup> | 1.0±0.1 <sup>c</sup> | 1.1±0.2 <sup>d</sup> |
| Adipose                       |                         |                       |                      |                      |                      |
| Epididymal                    | 2.4±0.7 <sup>abc</sup>  | 2.9±0.5 <sup>a</sup>  | 2.9±0.7              | 3.1±0.4 <sup>b</sup> | 3.3±0.8 <sup>c</sup> |
| Perirenal                     | 1.4±0.6 <sup>a</sup>    | 1.9±0.5               | 1.8±0.5              | 2.0±0.8 <sup>a</sup> | 1.6±0.5              |
| BAT                           | 1.8±0.6 <sup>ab</sup>   | 2.4±0.5 <sup>ac</sup> | 2.2±0.6 <sup>b</sup> | 2.0±0.4              | 1.9±0.5 <sup>c</sup> |
| Total fat                     | 5.6±1.7 <sup>abcd</sup> | 7.2±0.9 <sup>a</sup>  | 6.9±1.1 <sup>b</sup> | 7.1±1.3 <sup>c</sup> | 6.9±1.4 <sup>d</sup> |
| Carcass                       | 74±2                    | 74±2                  | 74±1                 | 74±2                 | 73±2                 |
| <b>Body length (cm)</b>       | 13.3±0.3                | 13.4±0.3              | 13.4±0.4             | 13.3±0.4             | 13.4±0.7             |
| <b>BMI (kg/m<sup>2</sup>)</b> | 5.4±0.4                 | 5.7±0.4               | 5.6±0.5              | 5.7±0.4              | 5.5±0.5              |
| <b>Plasma</b>                 |                         |                       |                      |                      |                      |
| TC (mg/dl)                    | 103±42                  | 112±25                | 96±18                | 94±21                | 96±17                |
| TG (mg/dl)                    | 73±26 <sup>a</sup>      | 87±33 <sup>bc</sup>   | 79±21 <sup>d</sup>   | 66±17 <sup>b</sup>   | 53±10 <sup>acd</sup> |

Values are mean±SD (n=13–14); <sup>a,b,c</sup>. Means in a row sharing a common superscript differ (p<0.05) by one-way ANOVA and Fisher's PLSD test.

**Table S4.** Diabetic assessment of 3 week old male Nile rats fed AFB diets with different CHO:fat ratios and GLoads for 10 weeks (Experiment 2) – Unsplit by T2DM.

| Diet #                                         | Diets                   |                          |                              |                          |                          |
|------------------------------------------------|-------------------------|--------------------------|------------------------------|--------------------------|--------------------------|
|                                                | 200                     | 201                      | 202                          | 203                      | 204                      |
| n=                                             | 14                      | 14                       | 14                           | 13                       | 14                       |
| <b>CHO:fat:protein %energy</b>                 | 70:10:20                | 60:20:20                 | 50:30:20                     | 40:40:20                 | 20:60:20                 |
| <b>P/S ratio</b>                               | 0.35                    | 0.35                     | 0.35                         | 0.35                     | 0.35                     |
| <b>Resistant/susceptible (% susceptible)</b>   |                         |                          |                              |                          |                          |
| 10 week RBG <75mg/dl>                          | 10/4 (29%)              | 10/4 (29%)               | 7/7 (50%)                    | 11/2 (15%)               | 11/3 (21%)               |
| 10 week 30' OGTT <175mg/dl>                    | 10/4 (29%)              | 7/7 (50%)                | 6/8 (57%)                    | 8/5 (38%)                | 7/7 (50%)                |
| 10 week FBG <60mg/dl>                          | 12/2 (14%)              | 8/6 (43%)                | 9/5 (36%)                    | 10/3 (23%)               | 10/4 (29%)               |
| <b>kcal/g</b>                                  | 4.0                     | 4.2                      | 4.5                          | 4.8                      | 5.5                      |
| <b>CHO:fat ratio</b>                           | 7                       | 3                        | 1.7                          | 1                        | 0.3                      |
| <b>Fat:protein %energy ratio</b>               | 0.5                     | 1.0                      | 1.5                          | 2.0                      | 3.0                      |
| <b>GLoad (g/2000 kcal)</b>                     | 280                     | 245                      | 204                          | 162                      | 82                       |
| <b>RBW (g)</b>                                 |                         |                          |                              |                          |                          |
| Initial (3 weeks of age)                       | 32±5                    | 32±4                     | 32±4                         | 31±4                     | 32±6                     |
| After 3 weeks                                  | 70±6                    | 71±7                     | 72±7                         | 71±9                     | 67±12                    |
| After 6 weeks                                  | 85±8                    | 87±9                     | 88±9                         | 85±11                    | 84±12                    |
| After 10 weeks                                 | 98±10                   | 100±12                   | 103±10                       | 99±14                    | 95±14                    |
| <b>BW gain/day (g/day)</b>                     | 0.87±0.11               | 0.90±0.14                | 0.94±0.14                    | 0.89±0.16                | 0.84±0.15                |
| <b>Food intake (g BW gained/1000 kcal)</b>     |                         |                          |                              |                          |                          |
| g/day                                          | 14.3±1.6 <sup>abc</sup> | 13.4±1.0 <sup>de</sup>   | 13.2±1.1 <sup>afg</sup>      | 11.4±1.0 <sup>bdf</sup>  | 10.6±1.3 <sup>ceg</sup>  |
| <b>kcal/day</b>                                |                         |                          |                              |                          |                          |
| week 2                                         | 24±3 <sup>a</sup>       | 25±2                     | 27±2 <sup>ab</sup>           | 24±2 <sup>bc</sup>       | 26±3 <sup>c</sup>        |
| week 8                                         | 23±4 <sup>a</sup>       | 24±3 <sup>b</sup>        | 25±3 <sup>c</sup>            | 23±2 <sup>d</sup>        | 28±4 <sup>abcd</sup>     |
| 10 week average                                | 23±3 <sup>ab</sup>      | 24±2 <sup>c</sup>        | 26±2 <sup>ad</sup>           | 22±2 <sup>de</sup>       | 26±3 <sup>bce</sup>      |
| <b>kcal/kg BW /10 week</b>                     | 235±23 <sup>a</sup>     | 242±22 <sup>b</sup>      | 250±21 <sup>cd</sup>         | 226±20 <sup>ce</sup>     | 277±34 <sup>abde</sup>   |
| <b>18:2(n-6) %energy</b>                       | 1.3                     | 2.6                      | 3.9                          | 5.2                      | 7.8                      |
| <b>GLoad</b>                                   |                         |                          |                              |                          |                          |
| /rat/day                                       | 3.2±0.4 <sup>abcd</sup> | 2.9±0.2 <sup>aefg</sup>  | 2.6±0.3 <sup>behi</sup>      | 1.8±0.2 <sup>cfhj</sup>  | 1.0±0.1 <sup>dgij</sup>  |
| /kg BW at 10weeks                              | 33±3 <sup>abcd</sup>    | 30±3 <sup>aefg</sup>     | 25±3 <sup>behi</sup>         | 18±2 <sup>cfhj</sup>     | 11±2 <sup>dgij</sup>     |
| Cumulative, 10 weeks                           | 225±25 <sup>abcd</sup>  | 206±16 <sup>aefg</sup>   | 180±20 <sup>behi</sup>       | 126±11 <sup>cfhj</sup>   | 71±9 <sup>dgij</sup>     |
| cumGLoad/ rat/kcal                             | 0.14 <sup>abcd</sup>    | 0.12 <sup>aefg</sup>     | 0.10 <sup>behi</sup>         | 0.08 <sup>cfhj</sup>     | 0.04 <sup>dgij</sup>     |
| <b>10<sup>th</sup> Week Water Intake (ml)</b>  | 46±37                   | 29±10                    | 42±30                        | 32±6                     | 38±20                    |
| <b>Food efficiency (g BW gained/1000 kcal)</b> |                         |                          |                              |                          |                          |
| 1-6 weeks                                      | 47±5                    | 48±5 <sup>a</sup>        | 45±6 <sup>b</sup>            | 50±8 <sup>bc</sup>       | 43±7 <sup>ac</sup>       |
| 1-10 weeks                                     | 38±5 <sup>a</sup>       | 38±4 <sup>b</sup>        | 37±6 <sup>c</sup>            | 40±5 <sup>d</sup>        | 32±5 <sup>abcd</sup>     |
| <b>RBG (mg/dl)</b>                             |                         |                          |                              |                          |                          |
| After 6 weeks                                  | 102±111                 | 73±25                    | 71±26                        | 64±17                    | 74±60                    |
| After 10 weeks                                 | <b>120±113</b>          | <b>86±67<sup>a</sup></b> | <b>167±172<sup>abc</sup></b> | <b>66±12<sup>b</sup></b> | <b>78±62<sup>c</sup></b> |
| Severity (> 75mg/dl)                           | +45                     | +11                      | +92                          | -9                       | +3                       |
| <b>OGTT (BG mg/dl)</b>                         |                         |                          |                              |                          |                          |

|                               |                     |                     |                        |                       |                     |
|-------------------------------|---------------------|---------------------|------------------------|-----------------------|---------------------|
| <b>After 6 weeks</b>          |                     |                     |                        |                       |                     |
| FBG, 0 min                    | 48±11               | 48±12               | 48±7                   | 47±14                 | 54±16               |
| 30 min                        | 213±116             | 187±82              | 220±82                 | 185±59                | 225±89              |
| <b>After 10 weeks</b>         |                     |                     |                        |                       |                     |
| FBG, 0 min                    | 54±30               | 55±14               | 54±13                  | 49±18                 | 57±23               |
| 30 min                        | 177±127             | 192±105             | 231±106                | 165±73                | 196±71              |
| 60 min                        | 127±76              | 105±63              | 184±135                | 127±81                | 185±148             |
| <b>Organ weight (%BW)</b>     |                     |                     |                        |                       |                     |
| Liver                         | 3.5±0.7             | 3.4±0.4             | 3.6±0.6                | 3.2±0.3               | 3.5±0.4             |
| Kidney                        | 0.9±0.6             | 0.7±0.1             | 0.7±0.1                | 0.7±0.1               | 0.8±0.1             |
| Cecum                         | 1.1±0.3             | 1.1±0.1             | 1.1±0.2                | 1.1±0.2               | 1.2±0.4             |
| Adipose                       |                     |                     |                        |                       |                     |
| Epididymal                    | 2.7±0.5             | 2.5±0.5             | 2.9±0.7                | 2.7±0.7               | 2.7±0.9             |
| Perirenal                     | 1.6±0.5             | 1.7±0.4             | 1.8±0.3                | 1.6±0.5               | 1.4±0.5             |
| BAT                           | 2.1±0.7             | 2.1±0.5             | 2.2±0.5                | 2.1±0.6               | 1.8±0.7             |
| Total fat                     | 6.4±1.5             | 6.3±1.2             | 6.9±1.2                | 6.5±1.5               | 6.0±1.7             |
| Carcass                       | 74±2                | 74±2                | 74±2                   | 75±2                  | 74±2                |
| <b>Body length (cm)</b>       | 13.3±0.8            | 13.2±0.3            | 13.3±0.3               | 13.3±0.7              | 13.2±0.5            |
| <b>BMI (kg/m<sup>2</sup>)</b> | 5.38±0.47           | 5.52±0.56           | 5.69±0.56              | 5.35±0.51             | 5.32±0.48           |
| <b>Plasma</b>                 |                     |                     |                        |                       |                     |
| TC (mg/dl)                    | 127±40 <sup>a</sup> | 119±29 <sup>b</sup> | 121±20 <sup>c</sup>    | 98±11 <sup>abcd</sup> | 120±19 <sup>d</sup> |
| TG (mg/dl)                    | 98±47 <sup>a</sup>  | 93±26 <sup>b</sup>  | 135±74 <sup>abcd</sup> | 75±20 <sup>c</sup>    | 72±30 <sup>d</sup>  |

Values are mean±SD (n=13-14); <sup>a,b,c</sup> Means in a row sharing a common superscript differ (p<0.05) by one-way ANOVA and Fisher's PLSD test.

**Table S5.** Diabetic assessment of 3 week old male Nile rats fed PKOB diets with different CHO:fat ratios and GLoads for 10 weeks (Experiment 1) – Split into resistant or susceptible to T2DM based on RBG.

|                                                      | Diet       |                   |            |                   |           |          |           |          |            |          |
|------------------------------------------------------|------------|-------------------|------------|-------------------|-----------|----------|-----------|----------|------------|----------|
| Diet #                                               | 195        |                   | 196        |                   | 197       |          | 198       |          | 199        |          |
| n=                                                   | 14         |                   | 14         |                   | 14        |          | 14        |          | 14         |          |
| CHO:fat:protein %energy                              | 70:10:20   |                   | 60:20:20   |                   | 50:30:20  |          | 40:40:20  |          | 20:60:20   |          |
| P/S Ratio                                            | 1.00       |                   | 1.00       |                   | 1.00      |          | 1.00      |          | 1.00       |          |
| Resistant/susceptible (% susceptible)                |            |                   |            |                   |           |          |           |          |            |          |
| 10 week RBG <75mg/dl>                                | 8/6 (43%)  |                   | 5/9 (64%)  |                   | 7/6 (46%) |          | 9/5 (36%) |          | 11/3 (21%) |          |
| 10 week 30'OGTT <175mg/dl>                           | 6/8 (57%)  |                   | 2/12 (86%) |                   | 6/7 (54%) |          | 6/8 (57%) |          | 11/3 (21%) |          |
| 10 week FBG <60mg/dl>                                | 12/2 (14%) |                   | 10/4 (29%) |                   | 9/4 (31%) |          | 7/7 (50%) |          | 8/6 (43%)  |          |
| kcal/g                                               | 4.0        |                   | 4.2        |                   | 4.5       |          | 4.8       |          | 5.5        |          |
| CHO:fat %energy ratio                                | 7.0        |                   | 3.0        |                   | 1.7       |          | 1.0       |          | 0.3        |          |
| Fat:protein %energy ratio                            | 0.5        |                   | 1          |                   | 1.5       |          | 2         |          | 3          |          |
| GLoad/2000 kcal                                      | 280        |                   | 245        |                   | 204       |          | 162       |          | 82         |          |
| Data Split into resistant and susceptible rats       |            |                   |            |                   |           |          |           |          |            |          |
|                                                      | Resist     | Suscept           | Resist     | Suscept.          | Resist.   | Suscept. | Resist.   | Suscept. | Resist.    | Suscept. |
| Kcal/day                                             | 24±3       | 28±7              | 25±1       | 27±1              | 25±2      | 29±3     | 23±1      | 25±1     | 26±2       | 25±1     |
| 10 week RBG (mg/dl)                                  | 59±12      | 257±213           | 63±4       | 212±131           | 61±7      | 293±176  | 62±8      | 197±76   | 60±7       | 79±2     |
| n=                                                   | 6          | 8                 | 5          | 9                 | 7         | 6        | 9         | 5        | 11         | 3        |
| RBW (g)                                              |            |                   |            |                   |           |          |           |          |            |          |
| Initial (3 weeks of age)                             | 31±6       | 32±6              | 32±2       | 31±3              | 30±5      | 35±6     | 30±3      | 32±4     | 33±5       | 30±3     |
| After 3 weeks                                        | 69±7       | 71±10             | 71±5       | 73±7              | 70±8      | 79±4     | 70±5      | 74±4     | 70±8       | 64±2     |
| After 6 weeks <sup>a</sup>                           | 86±9       | 84±8              | 86±8       | 94±7              | 85±11     | 96±9     | 84±6      | 94±6     | 90±10      | 81±8     |
| After 10 weeks                                       | 97±8       | 97±9              | 101±7      | 109±9             | 100±12    | 109±11   | 100±7     | 112±6    | 105±11     | 96±6     |
| BW gain/day (g/day)                                  | 0.88±0.1   | 0.87±0.1          | 0.92±0.1   | 1.04±0.1          | 0.92±0.1  | 0.98±0.2 | 0.92±0.1  | 1.06±0.1 | 1.00±0.1   | 0.85±0.1 |
| Energy intake                                        |            |                   |            |                   |           |          |           |          |            |          |
| g/day <sup>bc</sup>                                  | 15.0±1.6   | 17.4±4.1          | 14.0±0.4   | 14.9±0.6          | 12.9±1.2  | 15.0±1.3 | 11.8±0.6  | 12.6±0.5 | 10.6±0.7   | 10.0±0.2 |
| kcal/day                                             |            |                   |            |                   |           |          |           |          |            |          |
| week 2 <sup>b</sup>                                  | 23±2       | 25±3              | 25±1       | 25±2              | 26±3      | 28±1     | 23±2      | 24±1     | 26±2       | 25±1     |
| week 8                                               | 23±3       | 27±6              | 25±3       | 25±1              | 24±2      | 28±3     | 23±3      | 25±1     | 27±3       | 24±2     |
| 10 week average <sup>bc</sup>                        | 24±3       | 28±7              | 25±1       | 27±1              | 25±2      | 29±3     | 23±1      | 25±1     | 26±2       | 25±1     |
| kcal/kg BW /10 week <sup>b</sup>                     | 249±19     | 287±60            | 248±11     | 246±24            | 251±18    | 268±32   | 232±11    | 219±8    | 249±22     | 256±9    |
| 18:2(n-6) %energy                                    | 2.7        |                   | 5.3        |                   | 8         |          | 10.7      |          | 16         |          |
| GLoad                                                |            |                   |            |                   |           |          |           |          |            |          |
| /rat/day <sup>bc</sup>                               | 3.4±0.3    | 3.9±0.9           | 3.1±0.1    | 3.3±0.1           | 2.5±0.2   | 2.9±0.2  | 1.9±0.1   | 2.0±0.1  | 1.1±0.1    | 1.0±0.0  |
| /kg BW at 10 weeks <sup>b</sup>                      | 35±3       | 40±8              | 30±1       | 30±3              | 26±2      | 27±3     | 19±1      | 18±1     | 10±1       | 11±0     |
| Cumulative, 10 weeks <sup>bc</sup>                   | 237±25     | 274±64            | 215±7      | 228±10            | 178±16    | 206±18   | 131±7     | 139±5    | 75±5       | 70±2     |
| cumGLoad/rat/kcal                                    | 0.14       | 0.14              | 0.12       | 0.12              | 0.1       | 0.1      | 0.08      | 0.08     | 0.04       | 0.04     |
| 10 <sup>th</sup> Week Water Intake (ml) <sup>c</sup> | 37±15      | 140±239           | 28±10      | 73±65             | 36±13     | 126±100  | 33±6      | 40±26    | 41±8       | 37±17    |
| Food efficiency (g BW gained/1000 kcal)              |            |                   |            |                   |           |          |           |          |            |          |
| 1-6 weeks                                            | 49±6       | 43±8 <sup>a</sup> | 45±5       | 52±5 <sup>a</sup> | 46±5      | 45±6     | 52±7      | 48±10    | 46±5       | 44±9     |
| 1-10 weeks <sup>b</sup>                              | 37±4       | 32±7              | 36±4       | 39±4              | 37±3      | 34±6     | 40±5      | 43±3     | 38±6       | 34±3     |
| RBG (mg/dl)                                          |            |                   |            |                   |           |          |           |          |            |          |

|                               |              |                |             |                |             |                |             |               |             |             |
|-------------------------------|--------------|----------------|-------------|----------------|-------------|----------------|-------------|---------------|-------------|-------------|
| After 6 weeks <sup>bc</sup>   | 141±102      | 254±236        | 77±18       | 114±83         | 71±8        | 198±162        | 70±21       | 74±17         | 66±10       | 65±21       |
| After 10 weeks <sup>c</sup>   | <b>59±12</b> | <b>257±213</b> | <b>63±4</b> | <b>212±131</b> | <b>61±7</b> | <b>293±176</b> | <b>62±8</b> | <b>197±76</b> | <b>60±7</b> | <b>79±2</b> |
| Severity (mg/dl > 75)         | -16          | +182           | -12         | +137           | -14         | +217           | -13         | +125          | -15         | +4          |
| <b>After 6 weeks</b>          |              |                |             |                |             |                |             |               |             |             |
| FBG, 0 min                    | 56±18        | 57±19          | 54±7        | 64±29          | 47±8        | 58±20          | 50±9        | 58±15         | 53±9        | 50±7        |
| 30 min <sup>c</sup>           | 216±86       | 336±151        | 244±34      | 319±109        | 175±57      | 338±156        | 205±57      | 266±56        | 215±59      | 149±16      |
| <b>After 10 weeks</b>         |              |                |             |                |             |                |             |               |             |             |
| FBG, 0 min <sup>bc</sup>      | 48±12        | 47±6           | 53±8        | 57±10          | 49±20       | 60±17          | 58±17       | 63±21         | 57±13       | 82±37       |
| 30 min <sup>c</sup>           | 165±80       | 278±95         | 178±11      | 336±166        | 176±56      | 326±188        | 170±53      | 278±91        | 175±58      | 161±13      |
| 60 min <sup>c</sup>           | 120±120      | 182±88         | 95±41       | 233±113        | 116±44      | 302±177        | 160±71      | 244±107       | 148±58      | 158±66      |
| <b>Organ weight (%BW)</b>     |              |                |             |                |             |                |             |               |             |             |
| Liver <sup>c</sup>            | 3.5±0.4      | 4.0±0.9        | 3.5±0.1     | 3.7±0.7        | 3.5±0.5     | 4.2±0.9        | 3.2±0.3     | 3.7±0.4       | 3.7±0.4     | 3.2±0.2     |
| Kidney <sup>b</sup>           | 0.7±0.1      | 0.9±0.3        | 0.7±0.1     | 0.7±0.1        | 0.7±0.1     | 0.8±0.1        | 0.7±0.0     | 0.7±0.1       | 0.7±0.1     | 0.7±0.1     |
| Cecum <sup>b</sup>            | 1.2±0.1      | 1.5±0.7        | 1.0±0.1     | 1.1±0.2        | 1.1±0.2     | 1.1±0.4        | 1.1±0.1     | 1.0±0.1       | 1.1±0.2     | 1.0±0.1     |
| <b>Adipose</b>                |              |                |             |                |             |                |             |               |             |             |
| Epididymal <sup>b</sup>       | 2.5±0.5      | 2.3±0.9        | 3.2±0.5     | 2.8±0.4        | 2.8±0.6     | 3.0±1.0        | 3.1±0.4     | 3.2±0.5       | 3.4±0.9     | 3.2±0.8     |
| Perirenal <sup>ab</sup>       | 1.5±0.6      | 1.4±0.7        | 1.8±0.4     | 1.9±0.5        | 1.7±0.5     | 1.9±0.5        | 1.6±0.5     | 2.7±0.6       | 1.7±0.5     | 1.3±0.1     |
| BAT <sup>b</sup>              | 1.9±0.6      | 1.6±0.6        | 2.2±0.5     | 2.4±0.5        | 2.1±0.5     | 2.3±0.8        | 1.8±0.3     | 2.3±0.4       | 2.0±0.6     | 1.7±0.4     |
| Total fat <sup>b</sup>        | 5.8±1.4      | 5.4±2.1        | 7.1±1.0     | 7.2±0.9        | 6.6±1.0     | 7.2±1.3        | 6.4±1.0     | 8.2±0.7       | 7.1±1.5     | 6.2±0.4     |
| Carcass                       | 75±2         | 74±2           | 74±2        | 73±2           | 74±1        | 73±1           | 74±2        | 73±1          | 73±2        | 74±1        |
| <b>Body length (cm)</b>       |              |                |             |                |             |                |             |               |             |             |
|                               | 13.3±0.2     | 13.2±0.5       | 13.3±0.2    | 13.4±0.3       | 13.2±0.3    | 13.6±0.4       | 13.3±0.5    | 13.4±0.4      | 13.6±0.7    | 13.0±0.3    |
| <b>BMI (kg/m<sup>2</sup>)</b> |              |                |             |                |             |                |             |               |             |             |
|                               | 5.3±0.5      | 5.4±0.3        | 5.5±0.5     | 5.9±0.3        | 5.5±0.5     | 5.7±0.5        | 5.5±0.3     | 6.0±0.2       | 5.5±0.5     | 5.5±0.4     |
| <b>Plasma</b>                 |              |                |             |                |             |                |             |               |             |             |
| TC (mg/dl) <sup>a,c,d</sup>   | 84±14        | 128±55         | 96±16       | 121±26         | 91±9        | 101±25         | 102±20      | 79±13         | 95±17       | 101±22      |
| TG (mg/dl) <sup>a,c,d</sup>   | 69±17        | 78±35          | 65±15       | 100±33         | 71±15       | 88±26          | 59±14       | 79±16         | 54±10       | 50±13       |

Values are mean±SD (n=3-11); <sup>a</sup>Significant (P < 0.05) interaction term for diet x diabetes class (RBG <75 mg/dl) revealed by two-way ANOVA;

<sup>b</sup>Significant (P < 0.05) effect of diet (GLoad) by two-way ANOVA; <sup>c</sup>Significant (P < 0.05) increase due to diabetes (RBG >75 mg/dl) by two-way ANOVA; <sup>d</sup>Significant (P < 0.05) decrease due to diabetes (RBG >75 mg/dl) by two-way ANOVA.



**Table S6.** Diabetic assessment of 3 week old male Nile rats fed AFB diets with different CHO:fat ratios and GLoads for 10 weeks (Experiment 2) – Split into resistant or susceptible to T2DM.

| Diet #<br>n=                                         | Diets      |            |           |            |            |          |          |          |          |          |
|------------------------------------------------------|------------|------------|-----------|------------|------------|----------|----------|----------|----------|----------|
|                                                      | 200<br>14  | 201<br>14  | 202<br>14 | 203<br>13  | 204<br>14  |          |          |          |          |          |
| CHO:fat:protein %en                                  | 70:10:20   | 60:20:20   | 50:30:20  | 40:40:20   | 20:60:20   |          |          |          |          |          |
| P/S ratio                                            | 0.35       | 0.35       | 0.35      | 0.35       | 0.35       |          |          |          |          |          |
| Resistant/susceptible (% susceptible)                |            |            |           |            |            |          |          |          |          |          |
| 10 week RBG<br><75mg/dl>                             | 10/4 (29%) | 10/4 (29%) | 7/7 (50%) | 11/2 (15%) | 11/3 (21%) |          |          |          |          |          |
| 10 week 30'OGTT<br><175mg/dl>                        | 10/4 (29%) | 7/7 (50%)  | 6/8 (57%) | 8/5 (38%)  | 7/7 (50%)  |          |          |          |          |          |
| 10 week FBG<br><60mg/dl>                             | 12/2 (14%) | 8/6 (43%)  | 9/5 (36%) | 10/3 (23%) | 10/4 (29%) |          |          |          |          |          |
| kcal/g                                               | 4.0        | 4.2        | 4.5       | 4.8        | 5.5        |          |          |          |          |          |
| CHO:fat %en ratio                                    | 7.0        | 3.0        | 1.7       | 1.0        | 0.3        |          |          |          |          |          |
| Fat:protein %en ratio                                | (0.5)      | (1.0)      | (1.5)     | (2.0)      | (3.0)      |          |          |          |          |          |
| GLoad/2000 kcal                                      | 280        | 245        | 204       | 162        | 82         |          |          |          |          |          |
| Data Split into resistant and susceptible rats       |            |            |           |            |            |          |          |          |          |          |
|                                                      | Resist     | Suscept    | Resist    | Suscept    | Resist     | Suscept  | Resist   | Suscept  | Resist   | Suscept  |
| kcal/day                                             | 22±2       | 25±3       | 23±2      | 26±1       | 25±2       | 26±2     | 22±2     | 23±0     | 26±3     | 27±5     |
| 10 week RBG (mg/dl)                                  | 63±9       | 262±132    | 57±8      | 160±96     | 58±7       | 275±192  | 62±6     | 89±6     | 58±9     | 151±121  |
| n=                                                   | 10         | 4          | 10        | 4          | 7          | 7        | 11       | 2        | 11       | 3        |
| RBW (g)                                              |            |            |           |            |            |          |          |          |          |          |
| Initial(3 weeks old) <sup>c</sup>                    | 31±4       | 34±5       | 32±4      | 32±4       | 31±3       | 33±4     | 30±4     | 37±0     | 30±6     | 37±4     |
| After 3 weeks <sup>c</sup>                           | 68±6       | 74±5       | 69±7      | 74±3       | 70±6       | 73±9     | 70±9     | 77±5     | 64±10    | 77±15    |
| After 6 weeks <sup>c</sup>                           | 82±8       | 93±3       | 85±9      | 93±6       | 87±8       | 88±10    | 83±11    | 93±10    | 80±9     | 98±13    |
| After 10 weeks <sup>c</sup>                          | 95±10      | 107±6      | 96±11     | 109±7      | 103±10     | 103±10   | 97±15    | 109±11   | 92±11    | 108±21   |
| BW gain/day (g/day)                                  |            |            |           |            |            |          |          |          |          |          |
|                                                      | 0.8±0.1    | 1.0±0.1    | 0.9±0.1   | 1.0±0.1    | 1.0±0.1    | 0.9±0.1  | 0.9±0.1  | 0.9±0.1  | 0.8±0.1  | 0.9±0.2  |
| Food intake                                          |            |            |           |            |            |          |          |          |          |          |
| g/day <sup>bc</sup>                                  | 13.7±1.1   | 15.7±1.7   | 13.0±0.9  | 14.4±0.5   | 12.8±1.0   | 13.7±0.9 | 11.3±1.1 | 11.8±0.2 | 10.5±1.2 | 11.0±1.9 |
| kcal/day                                             |            |            |           |            |            |          |          |          |          |          |
| week 2 <sup>c</sup>                                  | 23±3       | 26±1       | 25±3      | 26±1       | 26±2       | 28±2     | 23±2     | 25±2     | 26±3     | 27±4     |
| week 8 <sup>bc</sup>                                 | 22±2       | 26±4       | 23±3      | 26±3       | 24±3       | 26±3     | 23±3     | 24±0     | 28±4     | 29±6     |
| 10 week average <sup>bc</sup>                        | 22±2       | 25±3       | 23±2      | 26±1       | 25±2       | 26±2     | 22±2     | 23±0     | 26±3     | 27±5     |
| kcal/kg BW/10 week <sup>b</sup>                      | 234±17     | 238±36     | 244±23    | 238±20     | 240±21     | 259±18   | 228±20   | 213±17   | 283±33   | 253±34   |
| 18:2(n-6) %energy                                    | 1.5        |            | 3         |            | 4.5        |          | 6        |          | 9        |          |
| GLoad                                                |            |            |           |            |            |          |          |          |          |          |
| /rat/day <sup>bc</sup>                               | 3.1±0.3    | 3.5±0.4    | 2.9±0.2   | 3.2±0.1    | 2.5±0.3    | 2.7±0.2  | 1.8±0.2  | 1.9±0.0  | 1.0±0.1  | 1.0±0.1  |
| /kg BW at 10 weeks <sup>b</sup>                      | 33±2       | 33±5       | 30±3      | 29±2       | 24±3       | 26±2     | 18±2     | 17±1     | 11±1     | 9±2      |
| Cumulative, 10weeks <sup>bc</sup>                    | 216±18     | 248±27     | 199±14    | 221±8      | 171±23     | 189±13   | 125±12   | 131±2    | 72±9     | 68±7     |
| cumGLoad/rat/kcal                                    | 0.14       | 0.14       | 0.12      | 0.12       | 0.10       | 0.10     | 0.08     | 0.08     | 0.04     | 0.04     |
| 10 <sup>th</sup> Week Water Intake (ml) <sup>c</sup> |            |            |           |            |            |          |          |          |          |          |
|                                                      | 34±14      | 77±60      | 29±9      | 30±11      | 30±14      | 54±38    | 31±5     | 35±11    | 33±13    | 52±35    |

**Food efficiency (g BW gained/1000 kcal)**

|                                     |             |                |             |               |             |                |             |             |             |                |
|-------------------------------------|-------------|----------------|-------------|---------------|-------------|----------------|-------------|-------------|-------------|----------------|
| 1- 6 weeks                          | 46±4        | 49±8           | 48±6        | 48±5          | 47±5        | 43±7           | 50±8        | 50±7        | 41±7        | 49±3           |
| 1-10 weeks                          | 38±4        | 38±9           | 37±5        | 39±4          | 39±5        | 34±5           | 40±5        | 40±6        | 32±5        | 34±6           |
| <b>RBG (mg/dl)</b>                  |             |                |             |               |             |                |             |             |             |                |
| After 6 weeks <sup>abc</sup>        | 64±13       | 199±188        | 68±20       | 88±35         | 61±13       | 82±33          | 65±18       | 59±5        | 60±9        | 125±135        |
| After 10 weeks <sup>abc</sup>       | <b>63±9</b> | <b>262±132</b> | <b>57±8</b> | <b>160±96</b> | <b>58±7</b> | <b>275±192</b> | <b>62±6</b> | <b>89±6</b> | <b>58±9</b> | <b>151±121</b> |
| Severity (mg/dl >75)                | -12         | +87            | -18         | +85           | -17         | +200           | -13         | +14         | -17         | +76            |
| <b>OGTT (BG mg/dl)</b>              |             |                |             |               |             |                |             |             |             |                |
| <b>After 6 weeks</b>                |             |                |             |               |             |                |             |             |             |                |
| FBG, 0 min <sup>c</sup>             | 44±9        | 56±13          | 49±13       | 47±11         | 45±7        | 51±5           | 45±14       | 58±11       | 52±16       | 63±18          |
| 30 min <sup>c</sup>                 | 167±46      | 327±168        | 161±56      | 253±107       | 187±66      | 253±88         | 181±56      | 206±97      | 197±37      | 328±156        |
| <b>After 10 weeks</b>               |             |                |             |               |             |                |             |             |             |                |
| FBG, 0 min <sup>c</sup>             | 44±13       | 78±49          | 53±11       | 59±21         | 54±18       | 54±8           | 44±15       | 74±22       | 56±26       | 62±5           |
| 30 min <sup>c</sup>                 | 121±48      | 316±165        | 167±63      | 253±170       | 180±60      | 282±122        | 151±60      | 240±126     | 172±37      | 283±108        |
| 60 min <sup>bc</sup>                | 101±35      | 194±115        | 93±32       | 135±113       | 124±71      | 244±161        | 105±47      | 246±150     | 135±67      | 370±233        |
| <b>Organ weight (%BW)</b>           |             |                |             |               |             |                |             |             |             |                |
| Liver <sup>c</sup>                  | 3.4±0.3     | 4.0±1.1        | 3.3±0.2     | 3.7±0.5       | 3.2±0.2     | 4.0±0.7        | 3.3±0.3     | 3.1±0.2     | 3.5±0.3     | 3.9±0.8        |
| Kidney                              | 0.9±0.7     | 0.8±0.2        | 0.7±0.1     | 0.8±0.2       | 0.7±0.0     | 0.8±0.1        | 0.8±0.2     | 0.6±0.1     | 0.7±0.0     | 0.8±0.1        |
| Cecum                               | 1.1±0.2     | 1.2±0.4        | 1.1±0.1     | 1.0±0.2       | 1.0±0.1     | 1.1±0.2        | 1.01±0.2    | 1.0±0.2     | 1.1±0.4     | 1.2±0.6        |
| <b>Adipose</b>                      |             |                |             |               |             |                |             |             |             |                |
| Epididymal                          | 2.7±0.6     | 2.6±0.4        | 2.6±0.6     | 2.5±0.1       | 2.8±0.4     | 3.0±1.0        | 2.6±0.7     | 3.2±0.0     | 2.5±0.8     | 3.5±1.1        |
| Perirenal <sup>c</sup>              | 1.5±0.5     | 1.9±0.5        | 1.6±0.5     | 1.9±0.2       | 1.7±0.4     | 1.8±0.3        | 1.5±0.3     | 2.4±0.1     | 1.3±0.4     | 2.0±0.5        |
| BAT <sup>c</sup>                    | 1.9±0.6     | 2.5±0.7        | 1.9±0.4     | 2.6±0.3       | 2.4±0.6     | 2.1±0.5        | 2.0±0.6     | 2.7±0.3     | 1.6±0.5     | 2.5±0.9        |
| Total fat <sup>c</sup>              | 6.1±1.5     | 7.0±1.5        | 6.1±1.3     | 6.9±0.3       | 6.9±1.3     | 6.9±1.1        | 6.1±1.3     | 8.4±0.3     | 5.4±1.4     | 8.0±0.8        |
| Carcass <sup>d</sup>                | 75±2        | 72±1           | 75±2        | 74±1          | 74±1        | 74±3           | 75±2        | 74±1        | 75±2        | 72±1           |
| <b>Body length (cm)<sup>c</sup></b> | 13.1±0.9    | 13.6±0.6       | 13.1±0.3    | 13.5±0.1      | 13.1±0.2    | 13.4±0.4       | 13.2±0.6    | 14.4±0.2    | 13.1±0.4    | 13.5±0.5       |
| <b>BMI (kg/m<sup>2</sup>)</b>       | 5.3±0.5     | 5.6±0.5        | 5.4±0.6     | 5.7±0.3       | 5.8±0.6     | 5.5±0.5        | 5.4±0.5     | 5.1±0.3     | 5.2±0.4     | 5.6±0.8        |
| <b>Plasma</b>                       |             |                |             |               |             |                |             |             |             |                |
| TC (mg/dl) <sup>c</sup>             | 116±26      | 151±59         | 113±19      | 136±44        | 113±21      | 129±17         | 99±12       | 94±4        | 116±19      | 132±10         |
| TG (mg/dl) <sup>bc</sup>            | 75±19       | 151±51         | 84±25       | 116±11        | 97±27       | 172±89         | 70±17       | 102±7       | 64±24       | 101±34         |

Values are mean±SD (n=2-11); <sup>a</sup>Significant (P < 0.05) interaction term for diet x diabetes class (RBG <75 mg/dl) revealed by two-way ANOVA;

<sup>b</sup>Significant (P < 0.05) effect of diet (GLoad) by two-way ANOVA; <sup>c</sup>Significant (P < 0.05) increase due to diabetes (RBG >75 mg/dl) by two-way ANOVA; <sup>d</sup>Significant (P < 0.05) decrease due to diabetes (RBG >75 mg/dl) by two-way ANOVA.

**Table S7.** Diabetic assessment of 3 week old male Nile rats fed PKOB diets with different CHO:fat ratios and GLoads for 10 weeks sorted into Quintiles of Average kcal/day (Experiment 1) – Unsplit by T2DM.

| <b>Q<sub>kcal</sub></b>                        | <b>Quintiles (kcal/day)</b> |                           |                          |                           |                               |
|------------------------------------------------|-----------------------------|---------------------------|--------------------------|---------------------------|-------------------------------|
|                                                | <b>1</b>                    | <b>2</b>                  | <b>3</b>                 | <b>4</b>                  | <b>5</b>                      |
| <b>n=</b>                                      | <b>13</b>                   | <b>14</b>                 | <b>14</b>                | <b>14</b>                 | <b>14</b>                     |
| <b>kcal/day</b>                                | 22.2±1.1                    | 24.1±0.3                  | 25.1±0.3                 | 26.4±0.6                  | 29.8±3.0                      |
| <b>P/S Ratio</b>                               | <b>1.00</b>                 | <b>1.00</b>               | <b>1.00</b>              | <b>1.00</b>               | <b>1.00</b>                   |
| <b>Resistant/susceptible (% susceptible)</b>   |                             |                           |                          |                           |                               |
| 10 week RBG <75mg/dl>                          | 11/2 (15%)                  | 9/5 (36%)                 | 8/6 (43%)                | 8/6 (43%)                 | 4/10 (71%)                    |
| 10 week 30' OGTT <175mg/dl>                    | 11/2 (15%)                  | 9/5 (36%)                 | 6/8 (57%)                | 4/10 (71%)                | 1/13                          |
| 10 week FBG <60mg/dl>                          | 10/3 (30%)                  | 10/4 (29%)                | 8/6 (43%)                | 11/3 (21%)                | 8/6 (43%)                     |
| <b>Diet Code</b>                               | 5, 0, 1, 7, 0               | 2, 2, 2, 4, 4             | 2, 4, 2, 1, 5            | 1, 6, 2, 2, 3             | 4, 2, 6, 0, 2                 |
| <b>CHO:fat Score</b>                           | 3.4±3.0                     | 2.0±2.3                   | 2.3±2.3                  | 2.2±1.8                   | 3.2±2.6                       |
| <b>est. CHO:fat:protein %energy</b>            | 63:17:20                    | 60:20:20                  | 56:24:20                 | 56:24:20                  | 51:29:20                      |
| <b>est. GLoad/2000 kcal</b>                    | 227±55 <sup>a</sup>         | 196±76                    | 191±64                   | 198±68                    | 166±78 <sup>a</sup>           |
| <b>RBW (g)</b>                                 |                             |                           |                          |                           |                               |
| Initial (3 weeks of age)                       | 31±4                        | 32±5                      | 31±4                     | 31±3                      | 34±5                          |
| After 3 weeks                                  | 67±6 <sup>a</sup>           | 68±6 <sup>b</sup>         | 70±6 <sup>c</sup>        | 72±7 <sup>d</sup>         | 78±6 <sup>abcd</sup>          |
| After 6 weeks                                  | 80±8 <sup>abc</sup>         | 84±7 <sup>def</sup>       | 90±7 <sup>adg</sup>      | 92±6 <sup>be</sup>        | 96±7 <sup>cfg</sup>           |
| After 10 weeks                                 | 94±10 <sup>abc</sup>        | 99±8 <sup>de</sup>        | 105±9 <sup>a</sup>       | 107±8 <sup>bd</sup>       | 109±8 <sup>ce</sup>           |
| <b>BW gain/day (g/day)</b>                     | 0.86±0.13 <sup>abc</sup>    | 0.90±0.12 <sup>de</sup>   | 0.97±0.13 <sup>a</sup>   | 1.02±0.15 <sup>bd</sup>   | 1.01±0.12 <sup>ce</sup>       |
| <b>Energy intake</b>                           |                             |                           |                          |                           |                               |
| g/day                                          | 12.3±1.2 <sup>a</sup>       | 12.2±1.8 <sup>b</sup>     | 12.7±2.1 <sup>c</sup>    | 13.7±1.7 <sup>d</sup>     | 16.1±3.2 <sup>abcd</sup>      |
| <b>kcal/day</b>                                |                             |                           |                          |                           |                               |
| week 2                                         | 22.4±1.5 <sup>abcd</sup>    | 24.2±1.4 <sup>aefg</sup>  | 25.4±1.5 <sup>beh</sup>  | 26.2±1.5 <sup>cfi</sup>   | 28.4±1.8 <sup>dghi</sup>      |
| week 8                                         | 23.0±1.6 <sup>abc</sup>     | 25.2±0.9 <sup>de</sup>    | 25.8±1.9 <sup>af</sup>   | 27.4±2.2 <sup>bdg</sup>   | 32.1±6.3 <sup>cefg</sup>      |
| 10 week average                                | 22.2±1.1                    | 24.1±0.3                  | 25.1±0.3                 | 26.4±0.6                  | 29.8±3.0                      |
| <b>kcal/kg BW /10 week</b>                     | 237±15 <sup>a</sup>         | 244±21 <sup>b</sup>       | 242±21 <sup>c</sup>      | 249±19 <sup>d</sup>       | 276±44 <sup>abcd</sup>        |
| <b>18:2(n-6) %energy</b>                       | 7.4±4.0                     | 9.9±4.9                   | 9.5±5.4                  | 8.6±4.6                   | 7.3±4.4                       |
| <b>GLoad</b>                                   |                             |                           |                          |                           |                               |
| /rat/day                                       | 2.33±0.62 <sup>a</sup>      | 2.09±0.88 <sup>b</sup>    | 2.26±1.03 <sup>c</sup>   | 2.57±0.91                 | 3.22±1.12 <sup>abc</sup>      |
| /kg BW at 10 weeks                             | 25±8                        | 21±9 <sup>a</sup>         | 22±10 <sup>b</sup>       | 24±9                      | 30±12 <sup>ab</sup>           |
| Cumulative, 10 weeks                           | 163±44 <sup>a</sup>         | 146±61 <sup>b</sup>       | 159±72 <sup>c</sup>      | 180±64                    | 225±79 <sup>abc</sup>         |
| cumGLoad/rat/kcal                              | 0.10                        | 0.09                      | 0.10                     | 0.10                      | 0.09                          |
| <b>10<sup>th</sup> Week Water Intake (ml)</b>  | 29±8 <sup>a</sup>           | 35±12 <sup>b</sup>        | 38±14 <sup>c</sup>       | 51±37 <sup>d</sup>        | 135±162 <sup>abcd</sup>       |
| <b>Food efficiency (g BW gained/1000 kcal)</b> |                             |                           |                          |                           |                               |
| 1-6 weeks                                      | 49±8                        | 46±7                      | 49±5                     | 47±5                      | 46±7                          |
| 1-10 weeks                                     | 38±4 <sup>a</sup>           | 37±5                      | 39±5 <sup>b</sup>        | 38±6 <sup>c</sup>         | 34±6 <sup>abc</sup>           |
| <b>RBG (mg/dl)</b>                             |                             |                           |                          |                           |                               |
| After 6 weeks                                  | 69±21 <sup>a</sup>          | 74±14 <sup>b</sup>        | 85±26 <sup>c</sup>       | 85±53 <sup>d</sup>        | 240±184 <sup>abcd</sup>       |
| After 10 weeks                                 | <b>64±14<sup>a</sup></b>    | <b>107±89<sup>b</sup></b> | <b>83±40<sup>c</sup></b> | <b>120±98<sup>d</sup></b> | <b>264±193<sup>abcd</sup></b> |
| Severity (>75mg/dl)                            | -11                         | +32                       | +8                       | +45                       | +189                          |
| <b>OGTT (BG mg/dl)</b>                         |                             |                           |                          |                           |                               |

|                               |                         |                      |                       |                       |                         |
|-------------------------------|-------------------------|----------------------|-----------------------|-----------------------|-------------------------|
| <b>After 6 weeks</b>          |                         |                      |                       |                       |                         |
| FBG, 0 min                    | 56±16                   | 54±12                | 48±8 <sup>a</sup>     | 54±13                 | 63±25 <sup>a</sup>      |
| 30 min                        | 183±44 <sup>ab</sup>    | 209±63 <sup>c</sup>  | 214±74 <sup>d</sup>   | 268±97 <sup>ae</sup>  | 358±121 <sup>bcde</sup> |
| <b>After 10 weeks</b>         |                         |                      |                       |                       |                         |
| FBG, 0 min                    | 49±13                   | 57±15                | 60±25                 | 53±13                 | 59±11                   |
| 30 min                        | 139±46 <sup>ab</sup>    | 193±76 <sup>c</sup>  | 192±69 <sup>d</sup>   | 236±105 <sup>ae</sup> | 353±142 <sup>bcde</sup> |
| 60 min                        | 115±64 <sup>a</sup>     | 150±90 <sup>b</sup>  | 144±70 <sup>c</sup>   | 186±100 <sup>d</sup>  | 271±135 <sup>abcd</sup> |
| <b>Organ weight (%BW)</b>     |                         |                      |                       |                       |                         |
| Liver                         | 3.3±0.3 <sup>a</sup>    | 3.4±0.3 <sup>b</sup> | 3.5±0.3 <sup>c</sup>  | 3.6±0.4 <sup>d</sup>  | 4.3±0.7 <sup>abcd</sup> |
| Kidney                        | 0.7±0.1 <sup>a</sup>    | 0.7±0.0 <sup>b</sup> | 0.7±0.1 <sup>c</sup>  | 0.7±0.0 <sup>d</sup>  | 0.8±0.2 <sup>abcd</sup> |
| Cecum                         | 1.2±0.2                 | 1.1±0.2              | 1.1±0.2               | 1.0±0.2 <sup>a</sup>  | 1.2±0.6 <sup>a</sup>    |
| Adipose                       |                         |                      |                       |                       |                         |
| Epididymal                    | 2.7±0.7                 | 3.0±0.7              | 3.1±0.7               | 3.1±0.6               | 2.8±0.8                 |
| Perirenal                     | 1.2±0.3 <sup>abcd</sup> | 1.8±0.6 <sup>a</sup> | 1.9±0.7 <sup>b</sup>  | 1.7±0.5 <sup>c</sup>  | 2.0±0.6 <sup>d</sup>    |
| BAT                           | 1.6±0.4 <sup>abcd</sup> | 2.0±0.4 <sup>a</sup> | 2.3±0.6 <sup>b</sup>  | 2.1±0.3 <sup>c</sup>  | 2.2±0.7 <sup>d</sup>    |
| Total fat                     | 5.5±1.2 <sup>abcd</sup> | 6.8±1.1 <sup>a</sup> | 7.3±1.1 <sup>b</sup>  | 6.9±1.0 <sup>c</sup>  | 6.9±1.8 <sup>d</sup>    |
| Carcass                       | 75±1 <sup>abc</sup>     | 74±1 <sup>d</sup>    | 74±1 <sup>ae</sup>    | 74±1 <sup>bf</sup>    | 72±2 <sup>cdef</sup>    |
| <b>Body length (cm)</b>       |                         |                      |                       |                       |                         |
|                               | 13.0±0.4 <sup>abc</sup> | 13.3±0.3             | 13.4±0.3 <sup>a</sup> | 13.5±0.6 <sup>b</sup> | 13.5±0.3 <sup>c</sup>   |
| <b>BMI (kg/m<sup>2</sup>)</b> |                         |                      |                       |                       |                         |
|                               | 5.4±0.5 <sup>ab</sup>   | 5.4±0.4 <sup>c</sup> | 5.6±0.4               | 5.7±0.5 <sup>a</sup>  | 5.8±0.3 <sup>bc</sup>   |
| <b>Plasma</b>                 |                         |                      |                       |                       |                         |
| TC (mg/dl)                    | 88±21 <sup>a</sup>      | 98±20                | 96±16                 | 104±26                | 115±40 <sup>a</sup>     |
| TG (mg/dl)                    | 55±11 <sup>ab</sup>     | 68±19 <sup>c</sup>   | 66±22 <sup>d</sup>    | 75±20 <sup>ae</sup>   | 93±33 <sup>bcde</sup>   |

Values are mean±SD (n=13–14); Diet Code = the number of rats represented by each diet in the final group of Resistant or Susceptible, e.g. the number of 70:10, 60:20, 50:20, etc; CHO:fat Score = the 'recalculated' average CHO:Fat ratio based on the diets of rats included in the Diet Code groups; <sup>a,b,c</sup>. Means in a row sharing a common superscript differ (p<0.05) by one-way ANOVA and Fisher's PLSD test.

**Table S8.** Diabetic assessment of 3 week old male Nile rats fed AFB diets with different CHO:Fat ratios and GLoads for 10 weeks sorted into Quintiles of Average kcal/day (Experiment 2) – Unsplit by T2DM.

| <b>Q<sub>kcal</sub></b><br><b>n=</b>           | <b>Quintiles (kcal/day)</b> |                         |                          |                         |                          |
|------------------------------------------------|-----------------------------|-------------------------|--------------------------|-------------------------|--------------------------|
|                                                | <b>1</b><br><b>13</b>       | <b>2</b><br><b>14</b>   | <b>3</b><br><b>14</b>    | <b>4</b><br><b>14</b>   | <b>5</b><br><b>14</b>    |
| <b>kcal/day</b>                                | 20.7±1.5                    | 22.9±0.4                | 23.8±0.3                 | 25.3±0.4                | 28.0±2.3                 |
| <b>P/S Ratio</b>                               | 0.35                        | 0.35                    | 0.35                     | 0.35                    | 0.35                     |
| <b>Resistant/susceptible (% susceptible)</b>   |                             |                         |                          |                         |                          |
| 10 week RBG <75mg/dl>                          | 12/1 (8%)                   | 11/3 (21%)              | 14/0 (0%)                | 6/8 (57%)               | 6/8 (57%)                |
| 10 week 30' OGTT <175mg/dl>                    | 11/2 (15%)                  | 5/9 (64%)               | 10/4 (29%)               | 8/6 (43%)               | 3/11 (79%)               |
| 10 week FBG <60mg/dl>                          | 10/3 (34%)                  | 9/5 (36%)               | 12/2 (14%)               | 9/5 (36%)               | 8/6 (43%)                |
| <b>Diet Code</b>                               | 5, 3, 0, 5, 0               | 4, 2, 2, 3, 3           | 2, 3, 2, 5, 2            | 2, 3, 6, 0, 3           | 1, 3, 4, 0, 6            |
| <b>CHO:fat Score</b>                           | 3.8±2.8 <sup>a</sup>        | 3.0±2.8                 | 2.3±2.2                  | 2.4±2.1                 | 1.8±1.8 <sup>a</sup>     |
| <b>est CHO:fat:protein %energy</b>             | 63:17:20                    | 60:20:20                | 56:24:20                 | 56:24:20                | 51:29:20                 |
| <b>est. GLoad/2000 kcal</b>                    | 227±55 <sup>a</sup>         | 196±76                  | 191±64                   | 198±68                  | 166±78 <sup>a</sup>      |
| <b>RBW (g)</b>                                 |                             |                         |                          |                         |                          |
| Initial (3 weeks old)                          | 29±4 <sup>abc</sup>         | 32±5 <sup>a</sup>       | 31±3                     | 33±4 <sup>b</sup>       | 33±5 <sup>c</sup>        |
| After 3 weeks                                  | 64±9 <sup>ab</sup>          | 68±7 <sup>c</sup>       | 70±7                     | 73±7 <sup>a</sup>       | 74±8 <sup>bc</sup>       |
| After 6 weeks                                  | 77±9 <sup>abcd</sup>        | 84±8 <sup>ae</sup>      | 86±8 <sup>b</sup>        | 89±9 <sup>c</sup>       | 91±9 <sup>de</sup>       |
| After 10 weeks                                 | 89±13 <sup>abc</sup>        | 96±11 <sup>d</sup>      | 100±9 <sup>a</sup>       | 103±10 <sup>b</sup>     | 106±10 <sup>cd</sup>     |
| <b>BW gain/day (g/day)</b>                     | 0.8±0.1 <sup>abc</sup>      | 0.9±0.1                 | 0.9±0.1 <sup>a</sup>     | 0.9±0.2 <sup>b</sup>    | 0.9±0.1 <sup>c</sup>     |
| <b>Energy intake</b>                           |                             |                         |                          |                         |                          |
| g/day                                          | 11.7±1.4 <sup>ab</sup>      | 12.1±1.8 <sup>c</sup>   | 12.5±1.4                 | 13.1±1.7 <sup>a</sup>   | 13.6±2.1 <sup>bc</sup>   |
| <b>kcal/day</b>                                |                             |                         |                          |                         |                          |
| week 2                                         | 22.1±2.2 <sup>abcd</sup>    | 23.9±1.8 <sup>efg</sup> | 25.2±1.2 <sup>bghi</sup> | 26.7±1.5 <sup>cfh</sup> | 28.0±1.9 <sup>dgi</sup>  |
| week 8                                         | 20.9±2.1 <sup>abcd</sup>    | 22.8±1.4 <sup>aef</sup> | 23.8±2.0 <sup>bg</sup>   | 25.1±1.6 <sup>ceh</sup> | 29.9±3.2 <sup>dfgh</sup> |
| 10 week average                                | 20.7±1.5                    | 22.9±0.4                | 23.8±0.3                 | 25.3±0.4                | 28.0±2.3                 |
| <b>kcal/kg BW /10 week</b>                     | 236±28 <sup>a</sup>         | 241±34 <sup>b</sup>     | 240±24 <sup>c</sup>      | 248±24                  | 266±30 <sup>abc</sup>    |
| <b>18:2(n-6) %energy</b>                       | 3.1±1.8 <sup>a</sup>        | 4.1±2.5                 | 4.3±2.1                  | 4.1±2.2                 | 5.1±2.5 <sup>a</sup>     |
| <b>GLoad</b>                                   |                             |                         |                          |                         |                          |
| /rat/day                                       | 2.4±0.6                     | 2.2±0.9                 | 2.3±0.8                  | 2.5±0.9                 | 2.3±1.1                  |
| /kg BW at 10weeks                              | 27±7                        | 23±8                    | 23±8                     | 24±8                    | 24±8                     |
| Cumulative, 10 weeks                           | 164±44                      | 154±62                  | 159±54                   | 174±61                  | 159±77                   |
| cumGLoad/rat/kcal                              | 0.11 <sup>a</sup>           | 0.10                    | 0.09                     | 0.10                    | 0.08 <sup>a</sup>        |
| <b>10<sup>th</sup> Week Water Intake (ml)</b>  | 32±10 <sup>a</sup>          | 30±6 <sup>b</sup>       | 33±12 <sup>c</sup>       | 34±15 <sup>d</sup>      | 60±45 <sup>abcd</sup>    |
| <b>Food efficiency (g BW gained/1000 kcal)</b> |                             |                         |                          |                         |                          |
| 1-6 weeks                                      | 49±6 <sup>a</sup>           | 48±7                    | 47±8                     | 45±7                    | 44±6 <sup>a</sup>        |
| 1-10 weeks                                     | 39±5 <sup>a</sup>           | 37±6                    | 38±6 <sup>b</sup>        | 37±6                    | 34±4 <sup>ab</sup>       |
| <b>RBG (mg/dl)</b>                             |                             |                         |                          |                         |                          |
| After 6 weeks                                  | 64±9 <sup>a</sup>           | 61±9 <sup>b</sup>       | 64±18 <sup>c</sup>       | 83±39                   | 113±120 <sup>abc</sup>   |
| After 10 weeks                                 | 82±68 <sup>a</sup>          | 64±15 <sup>b</sup>      | 60±7 <sup>c</sup>        | 122±102                 | 191±174 <sup>abc</sup>   |
| Severity (>75mg/dl)                            | +7                          | -11                     | -15                      | +47                     | +116                     |
| <b>OGTT (BG mg/dl)</b>                         |                             |                         |                          |                         |                          |

|                               |                         |                       |                      |                       |                         |
|-------------------------------|-------------------------|-----------------------|----------------------|-----------------------|-------------------------|
| <b>After 6 weeks</b>          |                         |                       |                      |                       |                         |
| FBG, 0 min                    | 46±11                   | 49±10                 | 50±14                | 52±14                 | 50±13                   |
| 30 min                        | 175±62 <sup>a</sup>     | 186±55 <sup>b</sup>   | 182±59 <sup>c</sup>  | 215±80                | 271±128 <sup>abc</sup>  |
| <b>After 10 weeks</b>         |                         |                       |                      |                       |                         |
| FBG, 0 min                    | 47±14                   | 53±18                 | 55±23                | 52±15                 | 62±27                   |
| 30 min                        | 136±46 <sup>a</sup>     | 178±79 <sup>b</sup>   | 164±55 <sup>c</sup>  | 187±72 <sup>d</sup>   | 294±138 <sup>abcd</sup> |
| 60 min                        | 86±16 <sup>a</sup>      | 140±69 <sup>b</sup>   | 117±69 <sup>c</sup>  | 129±77 <sup>d</sup>   | 254±169 <sup>abcd</sup> |
| <b>Organ weight (%BW)</b>     |                         |                       |                      |                       |                         |
| Liver                         | 3.1±0.3 <sup>a</sup>    | 3.3±0.3 <sup>b</sup>  | 3.4±0.3 <sup>c</sup> | 3.5±0.4 <sup>d</sup>  | 4.0±0.8 <sup>abcd</sup> |
| Kidney                        | 0.8±0.2                 | 0.8±0.6               | 0.7±0.0              | 0.7±0.1               | 0.8±0.1                 |
| Cecum                         | 1.1±0.2                 | 1.1±0.3 <sup>a</sup>  | 1.1±0.2              | 1.0±0.3 <sup>a</sup>  | 1.1±0.3                 |
| Adipose                       |                         |                       |                      |                       |                         |
| Epididymal                    | 2.4±0.7 <sup>a</sup>    | 3.0±0.9 <sup>a</sup>  | 2.6±0.5              | 2.9±0.7               | 2.7±0.5                 |
| Perirenal                     | 1.3±0.5 <sup>abcd</sup> | 1.7±0.5 <sup>a</sup>  | 1.6±0.4 <sup>b</sup> | 1.7±0.4 <sup>c</sup>  | 1.7±0.4 <sup>d</sup>    |
| BAT                           | 1.7±0.6 <sup>ab</sup>   | 2.2±0.5 <sup>a</sup>  | 2.0±0.5              | 2.1±0.6               | 2.2±0.7 <sup>b</sup>    |
| Total fat                     | 5.4±1.6 <sup>abc</sup>  | 6.9±1.6 <sup>a</sup>  | 6.3±1.0              | 6.7±1.2 <sup>b</sup>  | 6.7±1.2 <sup>c</sup>    |
| Carcass                       | 76±2 <sup>abcd</sup>    | 74±2 <sup>a</sup>     | 74±2 <sup>b</sup>    | 74±2 <sup>c</sup>     | 73±1 <sup>d</sup>       |
| <b>Body length (cm)</b>       |                         |                       |                      |                       |                         |
|                               | 12.9±0.5 <sup>abc</sup> | 13.3±0.8 <sup>a</sup> | 13.3±0.3             | 13.4±0.5 <sup>b</sup> | 13.3±0.4 <sup>c</sup>   |
| <b>BMI (kg/m<sup>2</sup>)</b> |                         |                       |                      |                       |                         |
|                               | 5.2±0.5 <sup>ab</sup>   | 5.3±0.6 <sup>c</sup>  | 5.5±0.4              | 5.5±0.6 <sup>a</sup>  | 5.7±0.4 <sup>bc</sup>   |
| <b>Plasma</b>                 |                         |                       |                      |                       |                         |
| TC (mg/dl)                    | 121±30                  | 113±19                | 104±14 <sup>a</sup>  | 125±26 <sup>a</sup>   | 122±37                  |
| TG (mg/dl)                    | 71±30 <sup>ab</sup>     | 89±26 <sup>c</sup>    | 75±17 <sup>d</sup>   | 108±48 <sup>a</sup>   | 128±76 <sup>bcd</sup>   |

Values are mean±SD (n=13–14); Diet Code = the number of rats represented by each diet in the final group of Resistant or Susceptible, e.g. the number of 70:10, 60:20, 50:20, etc; CHO:fat Score = the 'recalculated' average CHO:fat ratio based on the diets of rats included in the Diet Code groups; <sup>a,b,c</sup> Means in a row sharing a common superscript differ (p<0.05) by one-way ANOVA and Fisher's PLSD test.

**Table S9.** Diabetic assessment of 3 week old male Nile rats fed PKOB diets with different CHO:fat ratios and GLoads for 10 weeks (Experiment 1) – sorted into Quintiles of Average kcal/day and split into resistant or susceptible to T2DM.

| Q <sub>kcal</sub><br>n=                               | Quintiles (kcal/day) |              |             |              |             | 1            | 2           | 3            | 4           | 5             |
|-------------------------------------------------------|----------------------|--------------|-------------|--------------|-------------|--------------|-------------|--------------|-------------|---------------|
|                                                       | 13                   | 14           | 14          | 14           | 14          |              |             |              |             |               |
| kcal/day                                              | 20.7±1.5             | 22.9±0.4     | 23.8±0.3    | 25.3±0.4     | 28.0±2.3    |              |             |              |             |               |
| P/S ratio                                             | 1.00                 | 1.00         | 1.00        | 1.00         | 1.00        |              |             |              |             |               |
| <b>Resistant/susceptible (%susceptible)</b>           |                      |              |             |              |             |              |             |              |             |               |
| 10 week RBG<br><75mg/dl>                              | 11/2 (15%)           | 9/5 (36%)    | 8/6 (43%)   | 8/6 (43%)    | 4/10 (71%)  |              |             |              |             |               |
| 10 week 30' OGTT<br><175mg/dl>                        | 11/2 (15%)           | 9/5 (36%)    | 6/8 (57%)   | 4/10 (71%)   | 1/13        |              |             |              |             |               |
| 10 week FBG<br><60mg/dl>                              | 10/3 (30%)           | 10/4 (29%)   | 8/6 (43%)   | 11/3 (21%)   | 8/6 (43%)   |              |             |              |             |               |
| <b>Data Split into resistant and susceptible rats</b> |                      |              |             |              |             |              |             |              |             |               |
| n=                                                    | Resist<br>11         | Suscept<br>2 | Resist<br>9 | Suscept<br>5 | Resist<br>8 | Suscept<br>6 | Resist<br>8 | Suscept<br>6 | Resist<br>4 | Suscept<br>10 |
| est CHO:fat:protein<br>%energy                        | 61:19:20             | 64:16:20     | 54:26:20    | 52:28:20     | 53:27:20    | 58:22:20     | 52:28:20    | 58:22:20     | 56:24:20    | 62:18:20      |
| CHO:fat Score                                         | 3.2±3.0              | 4.0±4.2      | 2.1±2.1     | 1.9±2.9      | 2.0±2.4     | 2.7±2.4      | 1.9±2.3     | 2.7±0.8      | 2.3±3.2     | 3.5±2.4       |
| Diet Code*                                            | 4,0,1,6,0            | 1,0,0,1,0    | 1,2,2,2,2   | 1,0,0,2,2    | 1,2,1,0,4   | 1,2,1,1,1    | 1,1,2,1,3   | 0,5,0,1,0    | 1,0,1,0,2   | 3,2,5,0,0     |
| GLoad/2000 kcal                                       | 209±58               | 221±83       | 185±70      | 154±81       | 163±89      | 203±72       | 168±79      | 231±34       | 162±97      | 235±35        |
| <b>RBW (g)</b>                                        |                      |              |             |              |             |              |             |              |             |               |
| Initial (3 weeks of age)                              | 31±4                 | 29±2         | 32±6        | 31±4         | 30±4        | 32±4         | 31±3        | 32±4         | 35±3        | 33±6          |
| After 3 weeks <sup>c</sup>                            | 67±5                 | 67±11        | 69±6        | 66±6         | 69±7        | 72±4         | 71±6        | 74±8         | 79±6        | 78±6          |
| After 6 weeks <sup>c</sup>                            | 79±7                 | 83±18        | 85±8        | 83±6         | 89±6        | 92±7         | 91±3        | 94±9         | 100±8       | 95±6          |
| After 10 weeks <sup>c</sup>                           | 94±9                 | 96±21        | 99±9        | 99±7         | 103±8       | 107±10       | 105±4       | 110±11       | 112±9       | 108±8         |
| BW gain/day (g/day) <sup>cd</sup>                     | 0.9±0.1              | 0.9±0.2      | 0.9±0.1     | 0.9±0.1      | 1.0±0.1     | 1.0±0.1      | 1.0±0.2     | 1.0±0.1      | 1.0±0.1     | 1.00±0.1      |
| <b>Energy intake</b>                                  |                      |              |             |              |             |              |             |              |             |               |
| g/day <sup>c</sup>                                    | 12.3±1.3             | 12.4±0.5     | 12.3±1.7    | 11.9±2.0     | 12.2±2.2    | 13.4±1.8     | 13.1±2.0    | 14.5±0.7     | 13.9±2.9    | 17.0±2.9      |
| kcal/d                                                |                      |              |             |              |             |              |             |              |             |               |
| week 2 <sup>c</sup>                                   | 22.6±1.3             | 22.4±1.4     | 23.8±1.8    | 24.2±2.2     | 25.8±1.5    | 25.1±1.3     | 25.9±1.0    | 25.4±1.9     | 28.4±1.5    | 26.9±1.7      |
| week 8 <sup>c</sup>                                   | 21.8±1.6             | 22.0±2.4     | 23.4±1.1    | 23.5±1.1     | 24.8±2.4    | 25.1±1.2     | 27.3±2.2    | 25.1±1.1     | 29.3±2.6    | 29.1±3.5      |
| 10 week average <sup>c</sup>                          | 22.3±1.0             | 22.0±2.0     | 24.1±0.3    | 24.1±0.3     | 25.0±0.4    | 25.2±0.3     | 26.5±0.7    | 26.2±0.5     | 28.4±1.0    | 30.4±3.4      |
| kcal/kg BW /10 week                                   | 237±14               | 233±29       | 244±24      | 245±17       | 244±22      | 238±21       | 254±10      | 242±27       | 254±14      | 284±49        |
| 18:2(n-6) %energy                                     | 7.5±3.9              | 6.7±5.7      | 9.2±4.67    | 11.2±5.5     | 10.7±5.9    | 8.0±4.8      | 10.4±5.2    | 6.2±2.2      | 10.7±6.5    | 5.8±2.5       |
| <b>GLoad</b>                                          |                      |              |             |              |             |              |             |              |             |               |
| /rat/day                                              | 2.3±0.7              | 2.4±0.7      | 2.2±0.9     | 1.9±1.0      | 2.0±1.1     | 2.6±0.9      | 2.2±1.0     | 3.0±0.5      | 2.3±1.4     | 3.6±0.8       |
| /kg BW at 10 weeks                                    | 25±7                 | 26±13        | 23±9        | 19±10        | 20±11       | 24±9         | 21±11       | 28±6         | 21±14       | 34±10         |
| Cumulative, 10 weeks                                  | 162±45               | 167±48       | 156±60      | 129±67       | 143±78      | 179±64       | 155±72      | 213±33       | 161±96      | 251±57        |
| cumGLoad/rat/kcal                                     | 0.10                 | 0.11         | 0.09        | 0.08         | 0.08        | 0.10         | 0.08        | 0.11         | 0.08        | 0.12          |
| <b>10<sup>th</sup> week</b>                           |                      |              |             |              |             |              |             |              |             |               |
| Water Intake (ml)                                     | 31±7                 | 19±3         | 36±10       | 33±16        | 35±14       | 42±15        | 41±9        | 65±55        | 42±16       | 172±180       |
| <b>Food efficiency (g BWgained/1000 kcal)</b>         |                      |              |             |              |             |              |             |              |             |               |
| 1-6 weeks                                             | 49±8                 | 51±11        | 46±6        | 46±10        | 50±5        | 48±6         | 47±2        | 48±7         | 47±4        | 46±9          |
| 1-10 weeks                                            | 38±4                 | 40±7         | 37±6        | 38±4         | 39±4        | 39±6         | 38±6        | 39±4         | 37±3        | 34±7          |

**RBG (mg/dl)**

|                               |              |             |             |                |             |               |             |                |             |                |
|-------------------------------|--------------|-------------|-------------|----------------|-------------|---------------|-------------|----------------|-------------|----------------|
| After 6 weeks <sup>c</sup>    | 71±23        | 60±1        | 75±15       | 70±11          | 83±21       | 87±33         | 89±69       | 80±22          | 133±137     | 283±188        |
| After 10 weeks <sup>abc</sup> | <b>61±11</b> | <b>86±4</b> | <b>59±9</b> | <b>193±107</b> | <b>62±7</b> | <b>111±49</b> | <b>62±6</b> | <b>196±113</b> | <b>59±8</b> | <b>346±167</b> |
| Severity (>75mg/dl)           | -14          | +11         | -16         | +118           | -13         | +36           | -13         | +121           | -16         | +271           |

**OGTT (BG mg/dl)****After 6 weeks**

|                      |        |        |        |        |        |        |        |         |        |         |
|----------------------|--------|--------|--------|--------|--------|--------|--------|---------|--------|---------|
| FBG, 0 min           | 52±13  | 75±22  | 51±10  | 60±14  | 49±6   | 48±11  | 55±15  | 53±13   | 56±11  | 65±29   |
| 30 min <sup>bc</sup> | 187±47 | 162±11 | 193±51 | 240±77 | 194±65 | 241±83 | 243±77 | 301±116 | 276±17 | 391±130 |

**After 10 weeks**

|                      |        |        |        |        |        |        |         |         |        |         |
|----------------------|--------|--------|--------|--------|--------|--------|---------|---------|--------|---------|
| FBG, 0 min           | 50±14  | 45±2   | 56±17  | 60±14  | 55±17  | 68±34  | 52±16   | 54±10   | 57±6   | 60±13   |
| 30 min <sup>bc</sup> | 138±49 | 144±38 | 152±19 | 265±89 | 168±44 | 222±87 | 198±53  | 286±140 | 270±11 | 386±157 |
| 60 min <sup>bc</sup> | 113±66 | 126±81 | 105±50 | 231±92 | 131±55 | 162±89 | 164±114 | 215±76  | 194±40 | 302±149 |

**Organ weight (%BW)**

|                         |         |         |         |         |         |         |         |         |         |         |
|-------------------------|---------|---------|---------|---------|---------|---------|---------|---------|---------|---------|
| Liver <sup>c</sup>      | 3.3±0.3 | 3.4±0.3 | 3.5±0.3 | 3.6±0.4 | 4.3±0.7 | 3.3±0.3 | 3.4±0.3 | 3.5±0.3 | 3.6±0.4 | 4.3±0.7 |
| Kidney                  | 0.7±0.1 | 0.7±0.0 | 0.7±0.1 | 0.7±0.0 | 0.8±0.2 | 0.7±0.1 | 0.7±0.0 | 0.7±0.1 | 0.7±0.0 | 0.8±0.2 |
| Cecum                   | 1.2±0.2 | 1.1±0.2 | 1.1±0.2 | 1.0±0.2 | 1.2±0.6 | 1.2±0.3 | 1.1±0.2 | 1.1±0.2 | 1.0±0.2 | 1.2±0.6 |
| Adipose                 |         |         |         |         |         |         |         |         |         |         |
| Epididymal              | 2.7±0.7 | 3.0±0.7 | 3.1±0.7 | 3.1±0.6 | 2.8±0.8 | 2.7±0.8 | 3.0±0.8 | 3.1±0.5 | 3.1±0.4 | 2.8±0.9 |
| Perirenal <sup>ac</sup> | 1.2±0.3 | 1.8±0.6 | 1.9±0.7 | 1.7±0.5 | 2.0±0.6 | 1.2±0.3 | 1.8±0.6 | 1.9±0.7 | 1.7±0.5 | 2.0±0.6 |
| BAT <sup>c</sup>        | 1.6±0.4 | 2.0±0.4 | 2.3±0.6 | 2.1±0.3 | 2.2±0.7 | 1.6±0.4 | 2.0±0.4 | 2.3±0.6 | 2.1±0.3 | 2.2±0.7 |
| Total fat <sup>ac</sup> | 5.5±1.2 | 6.8±1.1 | 7.3±1.1 | 6.9±1.0 | 6.9±1.8 | 5.5±1.2 | 6.8±1.1 | 7.3±1.1 | 6.9±1.0 | 6.9±1.8 |
| Carcass <sup>c</sup>    | 75±1    | 74±1    | 74±1    | 74±1    | 72±2    | 75±1    | 74±1    | 74±1    | 74±1    | 72±2    |

|                                      |          |          |          |          |          |          |          |          |          |          |
|--------------------------------------|----------|----------|----------|----------|----------|----------|----------|----------|----------|----------|
| <b>Body length (cm)<sup>cd</sup></b> | 13.0±0.4 | 13.3±0.3 | 13.4±0.3 | 13.5±0.6 | 13.5±0.3 | 13.0±0.4 | 13.3±0.4 | 13.4±0.3 | 13.5±0.6 | 13.5±0.3 |
|--------------------------------------|----------|----------|----------|----------|----------|----------|----------|----------|----------|----------|

|                               |         |         |         |         |         |         |         |         |         |         |
|-------------------------------|---------|---------|---------|---------|---------|---------|---------|---------|---------|---------|
| <b>BMI (kg/m<sup>2</sup>)</b> | 5.4±0.5 | 5.4±0.4 | 5.6±0.4 | 5.7±0.5 | 5.8±0.3 | 5.4±0.5 | 5.4±0.4 | 5.6±0.5 | 5.7±0.5 | 5.8±0.3 |
|-------------------------------|---------|---------|---------|---------|---------|---------|---------|---------|---------|---------|

**Plasma**

|                          |       |       |       |       |       |        |       |        |        |        |
|--------------------------|-------|-------|-------|-------|-------|--------|-------|--------|--------|--------|
| TC (mg/dl)               | 90±21 | 80±27 | 98±13 | 98±28 | 90±9  | 103±20 | 95±20 | 116±31 | 103±13 | 119±46 |
| TG (mg/dl) <sup>bc</sup> | 56±10 | 50±17 | 62±17 | 78±21 | 63±17 | 71±28  | 67±13 | 86±24  | 73±20  | 100±35 |

Values are mean±SD (n=13–14); Diet Code = the number of rats represented by each diet in the final group of Resistant or Susceptible, e.g. The number of 70:10, 60:20, 50:20, etc; CHO:fat Score = the 'recalculated' average CHO:fat ratio based on the diets of rats included in the Diet Code groups;

<sup>a</sup>Significant (P < 0.05) interaction term for quintile x diabetes class (RBG <75 mg/dl) revealed by two-way ANOVA; <sup>b</sup>Significant (P < 0.05) effect of kcal/day by two-way ANOVA; <sup>c</sup>Significant (P < 0.05) increase due to diabetes (RBG >75 mg/dl) by two-way ANOVA; <sup>d</sup>Significant (P < 0.05) decrease due to diabetes (RBG >75 mg/dl) by two-way ANOVA.



**Table S10.** Diabetic assessment of 3 week old male Nile rats fed AFB diets with different CHO:fat ratios and GLoads for 10 weeks (Experiment 2) – sorted into Quintiles of Average kcal/day and split into resistant or susceptible to T2DM.

| Q <sub>kcal</sub><br>n=                        | Quintiles (kcal/day) |            |            |           |            |      |           |           |           |           |
|------------------------------------------------|----------------------|------------|------------|-----------|------------|------|-----------|-----------|-----------|-----------|
|                                                | 1<br>13              | 2<br>14    | 3<br>14    | 4<br>14   | 5<br>14    |      |           |           |           |           |
| Kcal/day                                       | 20.7±1.5             | 22.9±0.4   | 23.8±0.3   | 25.3±0.4  | 28.0±2.3   |      |           |           |           |           |
| P/S ratio                                      | 0.35                 | 0.35       | 0.35       | 0.35      | 0.35       |      |           |           |           |           |
| Resistant/susceptible (% susceptible)          |                      |            |            |           |            |      |           |           |           |           |
| 10 week RBG <75mg/dl>                          | 12/1 (8%)            | 11/3 (21%) | 14/0 (0%)  | 6/8 (57%) | 6/8 (57%)  |      |           |           |           |           |
| 10 week 30' OGTT <175mg/dl>                    | 11/2 (15%)           | 5/9 (64%)  | 10/4 (29%) | 8/6 (43%) | 3/11 (79%) |      |           |           |           |           |
| 10 week FBG <60mg/dl>                          | 10/3 (34%)           | 9/5 (36%)  | 12/2 (14%) | 9/5 (36%) | 8/6 (43%)  |      |           |           |           |           |
| Data Split into resistant and susceptible rats |                      |            |            |           |            |      |           |           |           |           |
|                                                | resist               | suscept    | resist     | suscept   | resist     | sus- | resist    | suscept   | resist    | suscept   |
| n=                                             | 12                   | 1          | 11         | 3         | 14         | 0    | 6         | 8         | 6         | 8         |
| est CHO:fat:protein %energy                    | 62:18:20             | 70:10:20   | 62:18:20   | 36:44:20  | 56:24:20   | n/a  | 44:36:20  | 62:18:20  | 40:40:20  | 56:24:20  |
| CHO:fat Score                                  | 3.5±2.7              | 7          | 3.5±2.9    | 0.8±0.4   | 2.3±2.2    | n/a  | 1.2±1.1   | 3.3±2.3   | 1.0±1.1   | 2.3±2.1   |
| Diet Code*                                     | 4,3,0,5,0            | 1,0,0,0,0  | 4,2,2,1,2  | 0,0,0,2,1 | 2,3,2,5,2  | n/a  | 0,1,2,0,3 | 2,2,4,0,0 | 0,1,1,0,4 | 1,2,3,0,2 |
| GLoad/2000 kcal                                | 222±55               | 280        | 213±76     | 135±46    | 191±64     | n/a  | 150±76    | 233±34    | 130±75    | 193±74    |
| RBW (g)                                        |                      |            |            |           |            |      |           |           |           |           |
| Initial (3 weeks old) <sup>b</sup>             | 29±4                 | 26         | 31±5       | 35±3      | 31±3       | n/a  | 35±4      | 32±3      | 29±4      | 36±3      |
| After 3 weeks <sup>ab</sup>                    | 64±9                 | 67         | 67±6       | 71±10     | 70±7       | n/a  | 75±9      | 71±6      | 67±6      | 79±5      |
| After 6 weeks <sup>ab</sup>                    | 76±9                 | 89         | 82±8       | 90±9      | 86±8       | n/a  | 90±10     | 89±8      | 85±7      | 96±8      |
| After 10 weeks <sup>ab</sup>                   | 88±13                | 107        | 95±10      | 100±16    | 100±10     | n/a  | 102±11    | 104±9     | 100±9     | 110±9     |
| BW gain/day (g/day)                            | 0.8±0.1              | 1.1        | 0.8±0.1    | 0.8±0.12  | 0.9±0.1    | n/a  | 0.9±0.2   | 0.9±0.1   | 0.9±0.1   | 1.0±0.1   |
| Energy intake                                  |                      |            |            |           |            |      |           |           |           |           |
| g/day <sup>c</sup>                             | 11.5±1.4             | 13.7       | 12.4±1.8   | 10.9±1.5  | 12.5±1.4   | n/a  | 12.0±1.8  | 14.0±1.1  | 12.5±1.9  | 14.4±2.0  |
| kcal/day                                       |                      |            |            |           |            |      |           |           |           |           |
| week 2 <sup>abc</sup>                          | 21.9±2.2             | 24.4       | 23.8±1.8   | 24.0±2.3  | 25.2±1.2   | n/a  | 26.7±1.1  | 26.8±1.8  | 27.9±2.2  | 28.1±1.7  |
| week 8 <sup>abc</sup>                          | 20.8±2.2             | 21.6       | 22.5±1.4   | 23.8±0.1  | 23.8±2.0   | n/a  | 25.4±1.5  | 25.0±1.8  | 30.8±2.9  | 29.3±3.5  |
| 10 week average <sup>c</sup>                   | 20.5±1.5             | 22.1       | 22.9±0.4   | 22.8±0.4  | 23.8±0.3   | n/a  | 25.4±0.4  | 25.2±0.4  | 27.8±2.9  | 28.0±2.0  |
| kcal/kg BW/day <sup>bc</sup>                   | 244±35               | 189        | 240±18     | 233±32    | 239±20     | n/a  | 240±20    | 244±23    | 271±36    | 254±27    |
| 18:2(n-6) %energy                              | 3.25±1.80            | 1.3        | 3.55±2.47  | 6.07±1.50 | 4.27±2.07  | n/a  | 5.63±2.42 | 2.93±1.15 | 6.28±2.39 | 4.23±2.38 |
| GLoad                                          |                      |            |            |           |            |      |           |           |           |           |
| /rat/day                                       | 2.29±0.61            | 3.09       | 2.38±0.90  | 1.55±0.55 | 2.27±0.77  | n/a  | 1.90±0.98 | 2.94±0.42 | 1.78±0.97 | 2.64±1.09 |
| /kg BW at 10 weeks <sup>a</sup>                | 26±7                 | 29         | 25±8       | 15±4      | 23±8       | n/a  | 18±8      | 28±3      | 17±8      | 25±11     |
| Cumulative, 10 weeks                           | 160±43               | 216        | 167±63     | 109±38    | 159±54     | n/a  | 133±69    | 206±29    | 124±68    | 185±77    |
| cumGLoad/rat/day/                              | 0.11                 | 0.14       | 0.10       | 0.07      | 0.09       | n/a  | 0.07      | 0.12      | 0.06      | 0.10      |
| 10th Week Water Intake (ml)                    | 31±9                 | 52         | 29±5       | 36±8      | 33±12      | n/a  | 35±14     | 33±16     | 35±20     | 76±50     |

**Food efficiency (g BW gained/1000 kcal)**

|            |      |    |      |      |      |     |      |      |      |      |
|------------|------|----|------|------|------|-----|------|------|------|------|
| 1-6 weeks  | 49±5 | 60 | 47±7 | 49±5 | 47±8 | n/a | 44±6 | 46±7 | 42±7 | 45±4 |
| 1-10 weeks | 38±5 | 49 | 37±6 | 37±8 | 38±6 | n/a | 36±6 | 37±5 | 34±5 | 34±4 |

**RBG (mg/dl)**

|                              |      |      |      |       |       |     |       |         |       |         |
|------------------------------|------|------|------|-------|-------|-----|-------|---------|-------|---------|
| After 6 weeks <sup>abc</sup> | 64±9 | 72   | 64±8 | 53±10 | 64±18 | n/a | 69±26 | 93±46   | 57±11 | 155±148 |
| After 10 weeks <sup>b</sup>  | 63±8 | 308  | 58±9 | 86±6  | 60±7  | n/a | 60±10 | 168±116 | 57±6  | 292±171 |
| Severity (>75mg/dl)          | -12  | +233 | -17  | +11   | -15   | n/a | -15   | +93     | -18   | +217    |

**OGTT (BG mg/dl)****After 6 weeks**

|                       |        |     |        |        |        |     |        |        |        |         |
|-----------------------|--------|-----|--------|--------|--------|-----|--------|--------|--------|---------|
| FBG, 0 min            | 45±11  | 56  | 46±10  | 57±8   | 50±14  | n/a | 51±19  | 52±10  | 44±6   | 54±15   |
| 30 min <sup>abc</sup> | 161±39 | 337 | 182±54 | 200±69 | 182±59 | n/a | 196±60 | 229±94 | 180±48 | 340±128 |

**After 10 weeks**

|                         |        |     |        |         |        |     |        |        |        |         |
|-------------------------|--------|-----|--------|---------|--------|-----|--------|--------|--------|---------|
| FBG, 0 min <sup>b</sup> | 47±14  | 40  | 48±17  | 68±18   | 55±23  | n/a | 47±16  | 55±14  | 49±11  | 72±33   |
| 30 min <sup>abc</sup>   | 127±42 | 211 | 166±75 | 220±96  | 164±55 | n/a | 156±47 | 211±81 | 184±34 | 377±127 |
| 60 min <sup>abc</sup>   | 88±15  | 67  | 121±37 | 209±124 | 117±69 | n/a | 122±74 | 134±84 | 116±55 | 357±149 |

**Organ weight (%BW)**

|                        |         |     |         |         |         |     |         |         |         |         |
|------------------------|---------|-----|---------|---------|---------|-----|---------|---------|---------|---------|
| Liver <sup>abc</sup>   | 3.1±0.2 | 3.5 | 3.4±0.2 | 3.1±0.2 | 3.4±0.3 | n/a | 3.3±0.2 | 3.6±0.4 | 3.5±0.3 | 4.4±0.8 |
| Kidney                 | 0.8±0.2 | 0.7 | 0.9±0.6 | 0.7±0.1 | 0.7±0.0 | n/a | 0.7±0.0 | 0.7±0.1 | 0.7±0.1 | 0.9±0.1 |
| Cecum                  | 1.1±0.2 | 1.1 | 1.1±0.2 | 1.3±0.5 | 1.1±0.2 | n/a | 1.0±0.5 | 1.0±0.1 | 1.2±0.3 | 1.1±0.3 |
| Adipose                |         |     |         |         |         |     |         |         |         |         |
| Epididymal             | 2.4±0.7 | 2.6 | 2.7±0.9 | 3.7±0.8 | 2.6±0.5 | n/a | 2.8±0.2 | 2.9±0.9 | 2.7±0.6 | 2.7±0.4 |
| Perirenal <sup>b</sup> | 1.2±0.4 | 2.0 | 1.6±0.5 | 2.1±0.6 | 1.6±0.4 | n/a | 1.5±0.3 | 1.9±0.3 | 1.6±0.4 | 1.9±0.4 |
| BAT <sup>b</sup>       | 1.6±0.5 | 2.7 | 2.2±0.5 | 2.3±0.7 | 2.0±0.5 | n/a | 1.9±0.7 | 2.3±0.5 | 2.0±0.7 | 2.4±0.6 |
| Total fat <sup>b</sup> | 5.2±1.6 | 7.2 | 6.5±1.7 | 8.1±0.5 | 6.3±1.0 | n/a | 6.2±1.0 | 7.1±1.1 | 6.2±1.3 | 7.0±1.2 |
| Carcass <sup>b</sup>   | 76±2    | 72  | 74±2    | 73±2    | 74±2    | n/a | 74±1    | 74±2    | 74±1    | 73±1    |

|                                     |          |      |          |          |          |     |          |          |          |          |
|-------------------------------------|----------|------|----------|----------|----------|-----|----------|----------|----------|----------|
| <b>Body length (cm)<sup>b</sup></b> | 12.9±0.5 | 13.1 | 13.2±0.8 | 13.9±0.7 | 13.3±0.3 | n/a | 13.3±0.5 | 13.5±0.4 | 13.1±0.3 | 13.5±0.3 |
|-------------------------------------|----------|------|----------|----------|----------|-----|----------|----------|----------|----------|

|                               |         |     |         |         |         |     |         |         |         |         |
|-------------------------------|---------|-----|---------|---------|---------|-----|---------|---------|---------|---------|
| <b>BMI (kg/m<sup>2</sup>)</b> | 5.1±0.5 | 6.0 | 5.4±0.6 | 4.9±0.3 | 5.5±0.4 | n/a | 5.6±0.6 | 5.5±0.6 | 5.6±0.6 | 5.8±0.3 |
|-------------------------------|---------|-----|---------|---------|---------|-----|---------|---------|---------|---------|

**Plasma**

|                         |        |     |        |        |        |     |        |        |        |        |
|-------------------------|--------|-----|--------|--------|--------|-----|--------|--------|--------|--------|
| TC (mg/dl)              | 116±26 | 178 | 114±18 | 110±27 | 104±14 | n/a | 118±10 | 131±34 | 105±30 | 136±37 |
| TG (mg/dl) <sup>b</sup> | 64±19  | 146 | 89±28  | 88±24  | 75±17  | n/a | 83±26  | 128±53 | 74±32  | 168±75 |

Values are mean±SD (n=13–14); Diet Code = the number of rats represented by each diet in the final group of Resistant or Susceptible e.g. The number of 70:10, 60:20, 50:20, etc; CHO:fat Score = the ‘recalculated’ average CHO:fat ratio based on the diets of rats included in the Diet Code groups; <sup>a</sup>Significant (P < 0.05) interaction term for quintile x diabetes class (RBG <75 mg/dl) revealed by two-way ANOVA; <sup>b</sup>Significant (P < 0.05) effect of kcal/day by two-way ANOVA; <sup>c</sup>Significant (P < 0.05) increase due to diabetes (RBG >75 mg/dl) by two-way ANOVA; <sup>d</sup>Significant (P < 0.05) decrease due to diabetes (RBG >75 mg/dl) by two-way ANOVA.

**Table S11.** Diabetic assessment of 3 week old male Nile rats fed PKOB diets with different CHO:fat ratios and GLoads for 10 weeks sorted into Quintiles of 10week RBG (Experiment 1).

| <b>Q<sub>RBG</sub></b><br><b>n=</b>            | <b>Quintiles (10 week RBG)</b> |                             |                             |                                |                                    |
|------------------------------------------------|--------------------------------|-----------------------------|-----------------------------|--------------------------------|------------------------------------|
|                                                | <b>1</b><br><b>13</b>          | <b>2</b><br><b>14</b>       | <b>3</b><br><b>14</b>       | <b>4</b><br><b>14</b>          | <b>5</b><br><b>14</b>              |
| <b>10week RBG</b>                              | resist<br>51±6 <sup>a</sup>    | resist<br>62±1 <sup>b</sup> | resist<br>70±3 <sup>c</sup> | suscept<br>101±40 <sup>d</sup> | suscept<br>353±110 <sup>abcd</sup> |
| <b>P/S Ratio</b>                               | 1.00                           | 1.00                        | 1.00                        | 1.00                           | 1.00                               |
| <b>Resistant/Susceptible (%susceptible)</b>    |                                |                             |                             |                                |                                    |
| 10 week RBG <75mg/dl>                          | 13/0 (0%)                      | 14/0 (0%)                   | 13/1 (7%)                   | 0/14 (100%)                    | 0/14 (100%)                        |
| 10 week 30' OGTT <175mg/dl>                    | 10/3 (23%)                     | 8/6 (43%)                   | 5/9 (64%)                   | 7/7 (50%)                      | 0/14 (100%)                        |
| 10 week FBG <60mg/dl>                          | 9/4 (29%)                      | 12/2 (14%)                  | 8/6 (43%)                   | 9/5 (36%)                      | 9/5 (36%)                          |
| <b>Diet Code</b>                               | 3, 1, 2, 3, 4                  | 1, 2, 3, 3, 5               | 4, 3, 2, 3, 2               | 3, 4, 2, 2, 3                  | 3, 4, 4, 3, 0                      |
| <b>CHO:fat Score</b>                           | 2.4±2.7                        | 1.6±1.8                     | 3.1±2.7                     | 2.8±2.5                        | 3.0±2.3                            |
| <b>est. CHO:fat:protein %energy</b>            | 56:24:20                       | 49:31:20                    | 60:20:20                    | 59:21:20                       | 60:20:20                           |
| <b>est. GLoad2000 kcal</b>                     | 177±79                         | 163±71 <sup>a</sup>         | 208±70                      | 200±74                         | 223±43 <sup>a</sup>                |
| <b>RBW (g)</b>                                 |                                |                             |                             |                                |                                    |
| Initial (3 weeks of age)                       | 30±5 <sup>a</sup>              | 31±3                        | 33±4                        | 31±4                           | 33±5 <sup>a</sup>                  |
| After 3 weeks                                  | 70±5                           | 69±8 <sup>a</sup>           | 70±6                        | 71±7                           | 75±7 <sup>a</sup>                  |
| After 6 weeks                                  | 87±6                           | 86±11 <sup>a</sup>          | 87±8                        | 89±10                          | 93±8 <sup>a</sup>                  |
| After 10 weeks                                 | 103±8                          | 100±11 <sup>a</sup>         | 101±9                       | 103±11                         | 108±9 <sup>a</sup>                 |
| <b>BW gain per day (g/day)</b>                 | 0.9±0.1                        | 0.9±0.1 <sup>a</sup>        | 0.9±0.2                     | 0.9±0.2                        | 1.0±0.1 <sup>a</sup>               |
| <b>Energy intake</b>                           |                                |                             |                             |                                |                                    |
| g/day                                          | 12.5±1.9 <sup>a</sup>          | 12.3±1.7 <sup>b</sup>       | 13.2±2.1 <sup>c</sup>       | 13.3±2.2 <sup>d</sup>          | 15.7±3.1 <sup>abcd</sup>           |
| <b>kcal/day</b>                                |                                |                             |                             |                                |                                    |
| week 2                                         | 25.0±1.9                       | 25.2±2.9                    | 24.3±2.5 <sup>a</sup>       | 25.6±2.0                       | 26.8±2.7 <sup>a</sup>              |
| week 8                                         | 25.4±1.5 <sup>a</sup>          | 25.9±2.9 <sup>b</sup>       | 25.4±2.7 <sup>c</sup>       | 25.3±2.4 <sup>d</sup>          | 31.5±6.7 <sup>abcd</sup>           |
| 10 week average                                | 24.6±1.4 <sup>a</sup>          | 25.1±2.4 <sup>b</sup>       | 24.4±2.3 <sup>c</sup>       | 25.2±2.0 <sup>d</sup>          | 28.4±4.1 <sup>abcd</sup>           |
| <b>kcal/kg BW /10 week</b>                     | 103±8 <sup>a</sup>             | 100±11                      | 101±9 <sup>b</sup>          | 103±11                         | 108±9 <sup>ab</sup>                |
| <b>18:2(n-6) %energy</b>                       | 9.7±5.3                        | 10.7±4.7 <sup>a</sup>       | 7.6±4.7                     | 8.2±5.0                        | 6.7±2.9 <sup>a</sup>               |
| <b>GLoad</b>                                   |                                |                             |                             |                                |                                    |
| /rat/day                                       | 2.17±0.94 <sup>a</sup>         | 2.02±0.88 <sup>b</sup>      | 2.54±0.91                   | 2.53±0.97                      | 3.20±0.93 <sup>ab</sup>            |
| /kg BW at 10 weeks                             | 22±10 <sup>a</sup>             | 20±9 <sup>b</sup>           | 25±9                        | 25±10                          | 30±10 <sup>ab</sup>                |
| Cumulative, 10 weeks                           | 152±65 <sup>a</sup>            | 141±61 <sup>b</sup>         | 178±63                      | 177±68                         | 224±66 <sup>ab</sup>               |
| cumGLoad/rat/kcal                              | 0.09                           | 0.08                        | 0.10                        | 0.10                           | 0.11                               |
| <b>10<sup>th</sup> week Water Intake (ml)</b>  | 38±7 <sup>a</sup>              | 35±13 <sup>b</sup>          | 34±11 <sup>c</sup>          | 33±14 <sup>d</sup>             | 148±157 <sup>abcd</sup>            |
| <b>Food efficiency (g BW gained/1000 kcal)</b> |                                |                             |                             |                                |                                    |
| 1-6 weeks                                      | 49±4                           | 48±8                        | 47±5                        | 47±7                           | 47±9                               |
| 1-10 weeks                                     | 39±5                           | 37±4                        | 38±5                        | 38±5                           | 36±7                               |
| <b>RBG (mg/dl)</b>                             |                                |                             |                             |                                |                                    |
| After 6 weeks                                  | 70±12 <sup>a</sup>             | 73±20 <sup>b</sup>          | 108±84 <sup>c</sup>         | 80±36 <sup>d</sup>             | 222±185 <sup>abcd</sup>            |
| after 10 weeks                                 | 51±6 <sup>ab</sup>             | 62±1 <sup>c</sup>           | 70±3 <sup>d</sup>           | 101±40 <sup>ae</sup>           | 353±110 <sup>bcd</sup>             |
| Severity (>75mg/dl)                            | -24                            | -13                         | -5                          | +26                            | +278                               |
| <b>OGTT (BG mg/dl)</b>                         |                                |                             |                             |                                |                                    |
| <b>After 6 weeks</b>                           |                                |                             |                             |                                |                                    |
| FBG, 0 min                                     | 51±9 <sup>a</sup>              | 51±9 <sup>b</sup>           | 54±15                       | 55±15                          | 64±25 <sup>ab</sup>                |
| 30 min                                         | 211±67 <sup>a</sup>            | 210±40 <sup>b</sup>         | 211±77 <sup>c</sup>         | 216±82 <sup>d</sup>            | 387±104 <sup>abcd</sup>            |

|                               |                      |                      |                      |                      |                         |
|-------------------------------|----------------------|----------------------|----------------------|----------------------|-------------------------|
| <b>After 10 weeks</b>         |                      |                      |                      |                      |                         |
| FBG, 0 min                    | 55±14                | 47±10 <sup>ab</sup>  | 58±17                | 59±24 <sup>a</sup>   | 61±11 <sup>b</sup>      |
| 30 min                        | 154±56 <sup>a</sup>  | 174±50 <sup>b</sup>  | 192±57 <sup>c</sup>  | 193±88 <sup>d</sup>  | 400±108 <sup>abcd</sup> |
| 60 min                        | 134±73 <sup>a</sup>  | 127±48 <sup>b</sup>  | 141±97 <sup>c</sup>  | 158±83 <sup>d</sup>  | 308±111 <sup>abcd</sup> |
| <b>Organ weight (%BW)</b>     |                      |                      |                      |                      |                         |
| Liver                         | 3.4±0.4 <sup>a</sup> | 3.6±0.4 <sup>b</sup> | 3.4±0.4 <sup>c</sup> | 3.5±0.4 <sup>d</sup> | 4.2±0.7 <sup>abcd</sup> |
| Kidney                        | 0.7±0.1 <sup>a</sup> | 0.7±0.1 <sup>b</sup> | 0.7±0.1 <sup>c</sup> | 0.7±0.1 <sup>d</sup> | 0.9±0.2 <sup>abcd</sup> |
| Cecum                         | 1.1±0.2              | 1.0±0.1 <sup>a</sup> | 1.1±0.2              | 1.0±0.2 <sup>b</sup> | 1.3±0.5 <sup>ab</sup>   |
| Adipose                       |                      |                      |                      |                      |                         |
| Epididymal                    | 3.0±0.6              | 3.1±0.7              | 2.9±0.7              | 3.0±0.8              | 2.7±0.7                 |
| Perirenal                     | 1.7±0.4              | 1.7±0.6              | 1.6±0.5              | 1.9±0.7              | 1.9±0.7                 |
| BAT                           | 2.0±0.4              | 1.9±0.6              | 2.0±0.5              | 2.2±0.7              | 2.1±0.6                 |
| Total fat                     | 6.6±1.0              | 6.7±1.5              | 6.5±1.3              | 7.1±1.4              | 6.7±1.7                 |
| Carcass                       | 75±2 <sup>a</sup>    | 74±2                 | 74±2 <sup>b</sup>    | 74±2                 | 73±1 <sup>ab</sup>      |
| <b>Body length (cm)</b>       | 13.3±0.2             | 13.2±0.4             | 13.5±0.7             | 13.3±0.4             | 13.4±0.3                |
| <b>BMI (kg/m<sup>2</sup>)</b> | 5.6±0.4              | 5.5±0.4              | 5.4±0.5 <sup>a</sup> | 5.6±0.4              | 5.8±0.4 <sup>a</sup>    |
| <b>Plasma</b>                 |                      |                      |                      |                      |                         |
| TC (mg/dl)                    | 100±19 <sup>a</sup>  | 90±15 <sup>b</sup>   | 93±15 <sup>c</sup>   | 96±22 <sup>d</sup>   | 123±41 <sup>abcd</sup>  |
| TG (mg/dl)                    | 64±17 <sup>a</sup>   | 57±12 <sup>bc</sup>  | 66±15 <sup>d</sup>   | 76±32 <sup>be</sup>  | 93±28 <sup>acde</sup>   |

Values are mean±SD (n=13–14); Diet Code = the number of rats represented by each diet in the final group of Resistant or Susceptible, e.g. the number of 70:10, 60:20, 50:20, etc; CHO:fat Score = the 'recalculated' average CHO:fat ratio based on the diets of rats included in the Diet Code groups; <sup>a,b,c</sup> Means in a row sharing a common superscript differ (p<0.05) by one-way ANOVA and Fisher's PLSD test.

**Table S12.** Diabetic assessment of 3 week old male Nile rats fed AFB diets with different CHO:fat ratios and GLoads for 10 weeks sorted into Quintiles of 10week RBG (Experiment 2).

| QRBG<br>n=                                     | Quintiles (10 week RBG) |                        |                          |                        |                          |
|------------------------------------------------|-------------------------|------------------------|--------------------------|------------------------|--------------------------|
|                                                | 1<br>13                 | 2<br>14                | 3<br>14                  | 4<br>14                | 5<br>14                  |
|                                                | <b>resist</b>           | <b>resist</b>          | <b>resist</b>            | <b>suscept</b>         | <b>suscept</b>           |
| <b>10week RBG</b>                              | 50±3 <sup>a</sup>       | 57±2 <sup>b</sup>      | 64±2 <sup>c</sup>        | 76±5 <sup>d</sup>      | 269±145 <sup>abcd</sup>  |
| <b>P/S Ratio</b>                               | <b>0.35</b>             | <b>0.35</b>            | <b>0.35</b>              | <b>0.35</b>            | <b>0.35</b>              |
| <b>Resistant/susceptible (%susceptible)</b>    |                         |                        |                          |                        |                          |
| 10 week RBG <75mg/dl>                          | 13/0 (0%)               | 14/0 (0%)              | 14/0 (0%)                | 7/7 (50%)              | 0/14 (100%)              |
| 10 week 30' OGTT <175mg/dl>                    | 11/2 (15%)              | 8/6 (43%)              | 8/6 (43%)                | 8/6 (43%)              | 2/12 (86%)               |
| 10 week FBG <60mg/dl>                          | 11/2 (15%)              | 10/4 (29%)             | 10/4 (29%)               | 9/5 (36%)              | 7/7 (50%)                |
| <b>Diet Code</b>                               | 2, 2, 2, 2, 5           | 2, 6, 3, 2, 1          | 2, 1, 1, 6, 4            | 5,3,2,1,3              | 3, 2, 6, 2, 1            |
| <b>CHO:fat Score</b>                           | 2.1±2.4                 | 2.8±2.0                | 1.9±2.3                  | 3.5±2.8                | 2.8±2.4                  |
| <b>est. CHO:fat:protein %energy</b>            | 54:26:20                | 59:21:20               | 52:28:20                 | 62:18:20               | 59:21:20                 |
| <b>est.GLoad/2000 kcal</b>                     | 169±80                  | 218±54 <sup>a</sup>    | 165±69 <sup>a</sup>      | 211±78                 | 211±54                   |
| <b>RBW (g)</b>                                 |                         |                        |                          |                        |                          |
| Initial (3 weeks of age)                       | 30±5                    | 30±3 <sup>a</sup>      | 32±4                     | 33±4                   | 33±4 <sup>a</sup>        |
| After 3 weeks                                  | 65±9 <sup>ab</sup>      | 67±7 <sup>c</sup>      | 70±8                     | 71±9 <sup>a</sup>      | 75±6 <sup>bc</sup>       |
| After 6 weeks                                  | 81±11 <sup>a</sup>      | 82±8 <sup>b</sup>      | 86±8                     | 87±11                  | 92±7 <sup>ab</sup>       |
| After 10 weeks                                 | 91±14 <sup>ab</sup>     | 95±12 <sup>c</sup>     | 100±8                    | 102±13 <sup>a</sup>    | 106±8 <sup>bc</sup>      |
| <b>BW gain per day (g/day)</b>                 | 0.8±0.2 <sup>a</sup>    | 0.9±0.1                | 0.9±0.1                  | 0.9±0.1                | 1.0±0.1 <sup>a</sup>     |
| <b>Energy intake</b>                           |                         |                        |                          |                        |                          |
| g/day                                          | 11.7±2.1 <sup>a</sup>   | 12.7±1.2 <sup>b</sup>  | 11.8±1.4 <sup>c</sup>    | 12.8±1.8               | 14.0±1.6 <sup>abc</sup>  |
| kcal/d                                         |                         |                        |                          |                        |                          |
| week 2                                         | 24.8±3.0 <sup>a</sup>   | 24.7±3.1 <sup>b</sup>  | 24.4±2.1 <sup>c</sup>    | 25.0±2.3 <sup>d</sup>  | 27.2±2.2 <sup>abcd</sup> |
| week 8                                         | 23.2±4.2 <sup>a</sup>   | 24.1±4.3               | 24.8±2.7                 | 23.9±2.5 <sup>b</sup>  | 26.7±4.1 <sup>ab</sup>   |
| 10 week average                                | 23.5±2.7 <sup>a</sup>   | 23.7±3.5 <sup>b</sup>  | 23.5±1.6 <sup>c</sup>    | 23.9±2.0 <sup>d</sup>  | 26.1±2.7 <sup>abcd</sup> |
| <b>kcal/kg BW /10 week</b>                     | 261±32 <sup>ab</sup>    | 250±32                 | 238±30 <sup>a</sup>      | 236±23 <sup>b</sup>    | 247±27                   |
| <b>18:2(n-6) %energy</b>                       | 5.0±2.6                 | 3.4±1.7 <sup>a</sup>   | 5.1±2.2 <sup>a</sup>     | 3.6±2.6                | 3.6±1.8                  |
| <b>Gload</b>                                   |                         |                        |                          |                        |                          |
| / rat / day                                    | 1.96±0.98 <sup>a</sup>  | 2.52±0.55 <sup>b</sup> | 1.87±0.76 <sup>bcd</sup> | 2.49±0.88 <sup>c</sup> | 2.71±0.78 <sup>ad</sup>  |
| / kg BW at 10 weeks                            | 21±9                    | 27±7 <sup>a</sup>      | 19±8 <sup>ab</sup>       | 25±9                   | 26±8 <sup>b</sup>        |
| Cumulative, 10weeks                            | 137±69 <sup>a</sup>     | 177±38 <sup>b</sup>    | 131±53 <sup>bcd</sup>    | 174±62 <sup>c</sup>    | 190±55 <sup>ad</sup>     |
| cumGload/rat/kcal                              | 0.08                    | 0.11                   | 0.08                     | 0.10                   | 0.10                     |
| <b>10<sup>th</sup> Week Water Intake (ml)</b>  | 34±13 <sup>a</sup>      | 33±14 <sup>b</sup>     | 30±8 <sup>c</sup>        | 28±6 <sup>d</sup>      | 62±42 <sup>abcd</sup>    |
| <b>Food efficiency (g BW gained/1000 kcal)</b> |                         |                        |                          |                        |                          |
| 1-6 weeks                                      | 43±8 <sup>a</sup>       | 47±6                   | 49±7 <sup>a</sup>        | 47±6                   | 47±7                     |
| 1-10 weeks                                     | 35±6                    | 37±6                   | 39±5                     | 38±5                   | 37±6                     |

**RBG (mg/dl)**

|               |                    |                    |                    |                   |                         |
|---------------|--------------------|--------------------|--------------------|-------------------|-------------------------|
| After 6 weeks | 62±13 <sup>a</sup> | 64±17 <sup>b</sup> | 66±18 <sup>c</sup> | 62±9 <sup>d</sup> | 132±116 <sup>abcd</sup> |
| After 10weeks | 50±3 <sup>a</sup>  | 57±2 <sup>b</sup>  | 64±2 <sup>c</sup>  | 76±5 <sup>d</sup> | 269±145 <sup>abcd</sup> |
| Severity      | -25                | -18                | -11                | +1                | +194                    |

**OGTT (BG mg/dl)****After 6 weeks**

|            |                     |                     |                     |                     |                         |
|------------|---------------------|---------------------|---------------------|---------------------|-------------------------|
| FBG, 0 min | 43±8 <sup>a</sup>   | 49±10               | 49±16               | 50±15               | 55±8 <sup>a</sup>       |
| 30 min     | 166±43 <sup>a</sup> | 167±51 <sup>b</sup> | 187±47 <sup>c</sup> | 194±64 <sup>d</sup> | 314±112 <sup>abcd</sup> |

**After 10 weeks**

|            |                     |                     |                     |                     |                         |
|------------|---------------------|---------------------|---------------------|---------------------|-------------------------|
| FBG, 0 min | 47±11 <sup>a</sup>  | 50±15 <sup>b</sup>  | 50±25 <sup>c</sup>  | 55±14               | 66±28 <sup>abc</sup>    |
| 30 min     | 141±43 <sup>a</sup> | 162±54 <sup>b</sup> | 163±52 <sup>c</sup> | 169±70 <sup>d</sup> | 322±125 <sup>abcd</sup> |
| 60 min     | 93±38 <sup>a</sup>  | 102±50 <sup>b</sup> | 128±63 <sup>c</sup> | 139±77 <sup>d</sup> | 264±166 <sup>abcd</sup> |

**Organ weight (%BW)**

|            |                       |                        |                       |                       |                         |
|------------|-----------------------|------------------------|-----------------------|-----------------------|-------------------------|
| Liver      | 3.3±0.3 <sup>a</sup>  | 3.3±0.3 <sup>b</sup>   | 3.3±0.3 <sup>c</sup>  | 3.4±0.2 <sup>d</sup>  | 4.0±0.8 <sup>abcd</sup> |
| Kidney     | 0.9±0.6 <sup>a</sup>  | 0.7±0.0                | 0.7±0.1               | 0.7±0.0 <sup>a</sup>  | 0.8±0.1                 |
| Cecum      | 1.0±0.3 <sup>a</sup>  | 1.1±0.2                | 1.2±0.2 <sup>ab</sup> | 1.0±0.3 <sup>b</sup>  | 1.1±0.3                 |
| Adipose    |                       |                        |                       |                       |                         |
| Epididymal | 2.5±0.8               | 2.4±0.5 <sup>abc</sup> | 2.9±0.5 <sup>a</sup>  | 2.9±0.6 <sup>b</sup>  | 2.9±0.7 <sup>c</sup>    |
| Perirenal  | 1.5±0.6 <sup>a</sup>  | 1.4±0.4 <sup>bc</sup>  | 1.6±0.4 <sup>d</sup>  | 1.7±0.4 <sup>b</sup>  | 2.0±0.3 <sup>acd</sup>  |
| BAT        | 1.9±0.6 <sup>ab</sup> | 1.9±0.5 <sup>cd</sup>  | 1.9±0.5 <sup>e</sup>  | 2.3±0.6 <sup>ac</sup> | 2.4±0.5 <sup>bde</sup>  |
| Total fat  | 5.9±1.9 <sup>ab</sup> | 5.6±1.2 <sup>cd</sup>  | 6.4±1.3               | 6.9±1.1 <sup>ac</sup> | 7.3±0.9 <sup>bd</sup>   |
| Carcass    | 75±2 <sup>a</sup>     | 75±2 <sup>b</sup>      | 75±1 <sup>c</sup>     | 74±2                  | 73±1 <sup>abc</sup>     |

**Body length (cm)**

|                         |                       |                       |                       |                        |
|-------------------------|-----------------------|-----------------------|-----------------------|------------------------|
| 12.9±0.3 <sup>abc</sup> | 13.1±0.4 <sup>d</sup> | 13.3±0.3 <sup>a</sup> | 13.4±0.7 <sup>b</sup> | 13.6±0.5 <sup>cd</sup> |
|-------------------------|-----------------------|-----------------------|-----------------------|------------------------|

**BMI (kg/m<sup>2</sup>)**

|         |         |         |         |         |
|---------|---------|---------|---------|---------|
| 5.3±0.5 | 5.4±0.6 | 5.5±0.3 | 5.5±0.7 | 5.5±0.5 |
|---------|---------|---------|---------|---------|

**Plasma**

|            |                     |                     |                     |                     |                        |
|------------|---------------------|---------------------|---------------------|---------------------|------------------------|
| TC (mg/dl) | 110±14 <sup>a</sup> | 115±23 <sup>b</sup> | 107±25 <sup>c</sup> | 115±15 <sup>d</sup> | 137±40 <sup>abcd</sup> |
| TG (mg/dl) | 68±23 <sup>a</sup>  | 76±24 <sup>b</sup>  | 77±25 <sup>c</sup>  | 92±23 <sup>d</sup>  | 157±66 <sup>abcd</sup> |

Values are mean±SD (n=13–14); Diet Code = the number of rats represented by each diet in the final group of Resistant or Susceptible, e.g. the number of 70:10, 60:20, 50:20, etc; CHO:fat Score = the 'recalculated' average CHO:fat ratio based on the diets of rats included in the Diet Code groups; <sup>a,b,c</sup> Means in a row sharing a common superscript differ (p<0.05) by one-way ANOVA and Fisher's PLSD test.
